# Supplementary material for: Photo-induced room temperature phosphorescence and thermally activated photochromism based on thianthrene derivatives
Source: Royal Society of Chemistry journal article supplement (doi:10.1039/d4tc02034k), 2024-01-01
Supplement: d4tc02034k1.pdf [file d4tc02034k1.pdf]

# Supporting Information

## Photo-induced room temperature phosphorescence and thermally activated photochromism based on thianthrene derivatives

Nan Li<sup>b</sup>, Yunsheng Wang<sup>\*,a</sup>, Zhen Li<sup>\*,a,b,c</sup>

### Affiliations:

<sup>a</sup>Joint School of National University of Singapore and Tianjin University, International Campus of Tianjin University, Binhai New City, Fuzhou, 350207, China.

<sup>b</sup>Institute of Molecular Aggregation Science, Tianjin University, Tianjin, 300072, China.

<sup>c</sup>Hubei Key Lab on Organic and Polymeric Opto-Electronic Materials, Department of Chemistry, Wuhan University, Wuhan, 430072, China.

Emails: [wangys\\_18@tju.edu.cn](mailto:wangys_18@tju.edu.cn); [lizhen@whu.edu.cn](mailto:lizhen@whu.edu.cn).

### Table of contents

#### 1. Experimental section

- 1.1 Instrumentation and materials
- 1.2 Synthesis
- 1.3 Preparation of the doped films

#### 2. Photophysical properties

- Supplementary Figures S1-S34
- Supplementary Tables S1-S6
- Supplementary Videos 1-8

#### 3. Supplementary references

## 1. Experimental section

### 1.1 Instrumentation and materials

$^1\text{H}$  NMR spectra and  $^{13}\text{C}$  NMR spectra were recorded on 600 MHz JEOL nuclear magnetic resonance spectrometer. High resolution mass spectra (HRMS) were measured on a UHPLC/ Q-TOF MS. High-performance liquid chromatogram (HPLC) spectra were recorded on Shimadzu LC-2050. UV-vis spectra were measured on a Shimadzu UV-2600. Photoluminescence spectra were performed on a Hitachi F-4600 fluorescence spectrophotometer. The single-crystal X-ray diffraction data were collected in XtaLAB SuperNova X-ray diffractometer. Fluorescence quantum yields and lifetimes were determined with FLS1000 spectrometer. Electron paramagnetic resonance (EPR) measurements at X-band (9.5 GHz, actual: 9430.72 MHz, power: 0.998 mW, sweep time: 1.0 min) were performed using a JES-FA200 spectrometer, and the spectra were obtained using electron paramagnetic resonance (JES-FA200) with a xenon lamp (500 W Xe-Hg lamp and equipped with filters) as the excitation source. The reagents were all purchased from commercial sources and used without further purification. Gaussian 09 program was used to perform TD-DFT calculations. The ground state ( $S_0$ ) geometries were optimized for gas-phase molecular structures based on the B3LYP/6-311G (d) level. The reorganization energy ( $\lambda$ ) was computed from the neutral and cationic geometries obtained at the B3LYP/6-31G (d) level. The spin density/odd electron density was completed with the assistance of Multiwfn<sup>1</sup>.

### 1.2 Synthesis

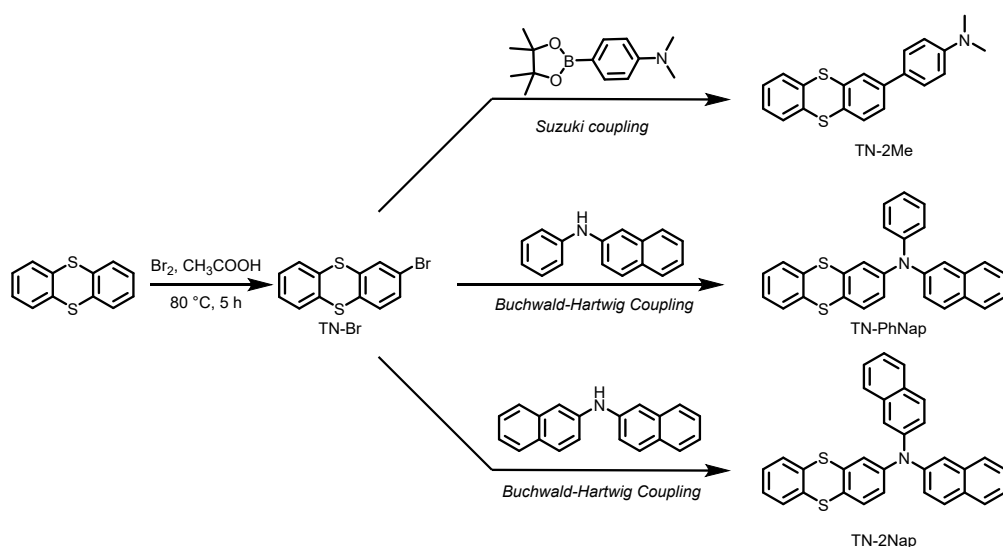

**Scheme S1** The synthetic routes of TN-2Me, TN-PhNap and TN-2Nap<sup>2-4</sup>.

### **2-bromothianthrene (TN-Br)**

To a CH<sub>3</sub>COOH solution (60 mL) containing thianthrene (6.50 g, 30.0 mmol) at 0 °C, Br<sub>2</sub> (5.76 g, 36.0 mmol) was added dropwise. After heated to 80 °C and stirred for 5 h, the mixture was allowed to cool to room temperature and poured into the NaHSO<sub>3</sub> solution. Then, the mixture was extracted with CH<sub>2</sub>Cl<sub>2</sub> several times. The organic layers were combined, dried over anhydrous Na<sub>2</sub>SO<sub>4</sub> and concentrated. The crude product was purified on a silica column to give the target product (7.35 g, 83%).

### ***N,N*-dimethyl-4-(thianthren-2-yl) aniline (TN-2Me)**

Under a N<sub>2</sub> atmosphere, TN-Br (1.48 g, 5 mmol), 4-(*N,N*-Dimethylamino)benzeneboronic acid pinacol ester (1.10 g, 5 mmol), and Pd (PPh<sub>3</sub>)<sub>4</sub> (0.29 g, 0.25 mmol) were added to the mixture of THF (30 mL) and 2 M K<sub>2</sub>CO<sub>3</sub> (20 mL). The mixture was stirred at 110 °C for 12 h. After cooled to room temperature, the mixture was poured into water (50 mL) and extracted with CH<sub>2</sub>Cl<sub>2</sub> several times. The organic layers were combined, dried over anhydrous Na<sub>2</sub>SO<sub>4</sub> and concentrated. The crude product was purified by column chromatography on silica gel using petroleum ether/dichloromethane=10:1 as eluent to afford a white solid (1.09 g, 65%).

<sup>1</sup>H NMR (600 MHz, Chloroform-*d*) δ 7.68 (m, 1H), 7.52-7.45 (m, 4H), 7.44-7.40 (m, 1H), 7.26-7.23 (m, 2H), 6.80-6.76 (m, 2H), 3.00 (s, 6H). <sup>13</sup>C NMR (151 MHz, Chloroform-*d*) δ 150.34, 141.24, 136.02, 135.99, 135.79, 132.59, 128.99, 128.92, 128.85, 127.77, 127.74, 127.70, 127.45, 126.40, 125.71, 112.77, 40.63. HRMS (ESI): *m/z* calculated for C<sub>20</sub>H<sub>18</sub>NS<sub>2</sub>: 336.0875 [M+H]<sup>+</sup>, found: 336.0837.

### ***N*-(naphthalen-2-yl)-*N*-phenylthianthren-2-amine (TN-PhNap)**

*N*-phenylnaphthalen-2-amine (1.10 g, 5 mmol), TN-Br (1.48 g, 5 mmol), potassiumtert-butoxide (1.12 g, 10 mmol), palladium acetate (56 mg, 0.25 mmol) and tri-tert-butylphosphine solution (0.14 mL, 0.06 mmol) were dissolved in toluene (30 mL) in a Schlenk tube. The resultant mixture was refluxed for 12 hours under nitrogen, then concentrated by rotary evaporation. The crude product was purified by column chromatography on silica gel using petroleum ether/dichloromethane=10:1 as eluent to afford a white solid (1.84 g, 85%).

<sup>1</sup>H NMR (600 MHz, Chloroform-*d*) δ 7.77 (d, *J* = 8.0 Hz, 1H), 7.73 (d, *J* = 8.8 Hz, 1H), 7.60 (d, *J* = 8.2 Hz, 1H), 7.52-7.47 (m, 1H), 7.46-7.43 (m, 1H), 7.43-7.35 (m, 3H), 7.33 (d, *J* = 8.5 Hz, 1H), 7.30-7.20 (m, 6H), 7.14-7.09 (m, 2H), 7.09 – 7.04 (m, 1H),

7.00 (dd,  $J = 8.4, 2.4$  Hz, 1H).  $^{13}\text{C}$  NMR (151 MHz, Chloroform-*d*)  $\delta$  147.98, 147.30, 144.96, 136.99, 136.23, 135.63, 134.46, 130.41, 129.61, 129.38, 129.30, 128.94, 128.83, 128.17, 127.83, 127.74, 127.17, 126.54, 124.97, 124.80, 124.60, 123.69, 123.22, 121.13. HRMS (ESI):  $m/z$  calculated for  $\text{C}_{28}\text{H}_{19}\text{NS}_2$ : 434.1032  $[\text{M}+\text{H}]^+$ , found: 434.0955.

### ***N, N*-di(naphthalen-2-yl) thianthren-2-amine (TN-2Nap)**

Following the similar synthetic method for TN-PhNap to give TN-2Nap (2.13 g, 88%) as white solid.  $^1\text{H}$  NMR (600 MHz, Chloroform-*d*)  $\delta$  7.80-7.76 (m, 2H), 7.75 (d,  $J = 8.8$  Hz, 2H), 7.63-7.55 (m, 2H), 7.53-7.48 (m, 1H), 7.46 (d,  $J = 2.2$  Hz, 2H), 7.45-7.37 (m, 5H), 7.35 (d,  $J = 8.5$  Hz, 1H), 7.32-7.27 (m, 3H), 7.27-7.20 (m, 2H), 7.05 (dd,  $J = 8.4, 2.4$  Hz, 1H).  $^{13}\text{C}$  NMR (151 MHz, Chloroform-*d*)  $\delta$  147.90, 144.95, 137.10, 136.17, 135.60, 134.46, 130.51, 129.46, 129.39, 128.97, 128.84, 128.53, 127.85, 127.76, 127.21, 126.60, 125.07, 124.67, 123.97, 123.49, 121.29. HRMS (ESI):  $m/z$  calculated for  $\text{C}_{32}\text{H}_{21}\text{NS}_2$ : 484.1188  $[\text{M}+\text{H}]^+$ , found: 484.1116.

### **1.3 Preparation of the doped films**

Dissolve 1.00 g PMMA and 0.03 mmol TN-2Me/TN-PhNap/TN-2Nap in 10 mL THF solution. The solution was placed in an evaporating dish with a flat bottom, then stood for ~48 hours until the solvent was evaporated and the doping system was solidified. After drying at 60°C for 24 hours, the film was cut and its photophysical properties were studied. The preparation of the polystyrene-doped system, utilizing polystyrene as a rigid polymer matrix, follows a similar procedure to that of the PMMA-doped system.

## **2. Photophysical properties**

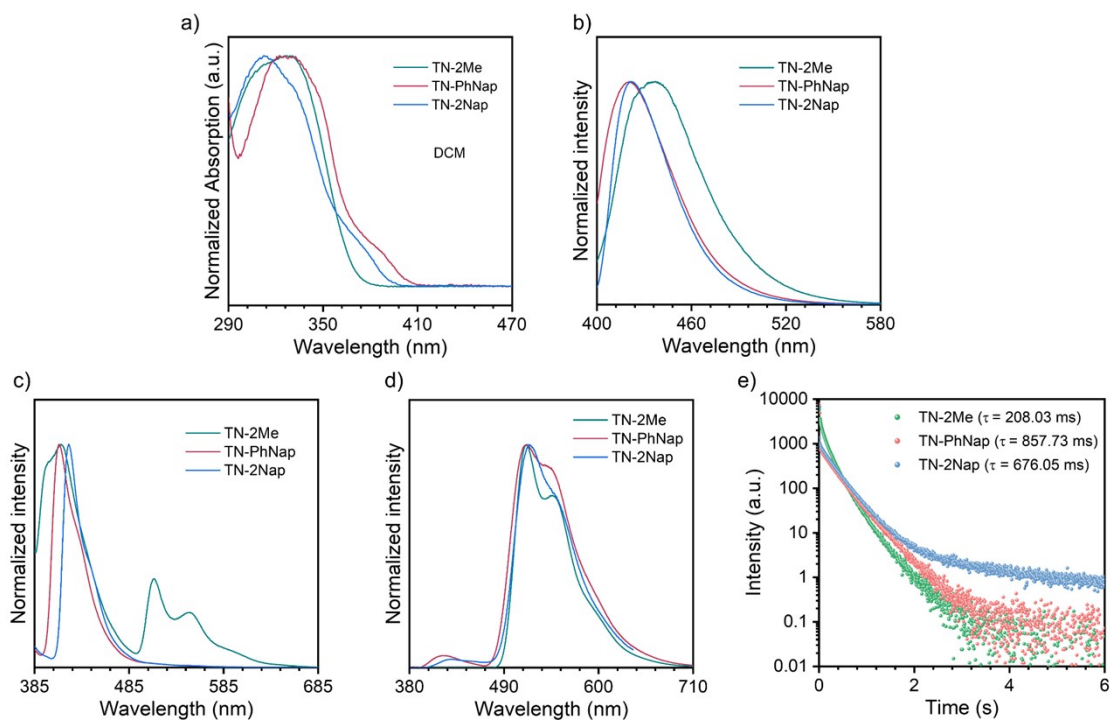

**Fig. S1** (a) Absorption spectra of TN-2Me, TN-PhNap, and TN-2Nap in dichloromethane (DCM) solution ( $c = 1.0 \times 10^{-5} \text{ mol L}^{-1}$ ) at room temperature. (b) Normalized steady-state photoluminescence (PL) spectra of TN-2Me, TN-PhNap, and TN-2Nap in DCM solution at room temperature and (c) 77 K. (d) Normalized delayed (1.0 ms) PL spectra of TN-2Me, TN-PhNap, and TN-2Nap in dichloromethane (DCM) solution at 77 K. (e) PL intensity decay curves of TN-2Me, TN-PhNap, and TN-2Nap in DCM solution at 77 K ( $\lambda_{\text{em}} = 520 \text{ nm}$ ).

m

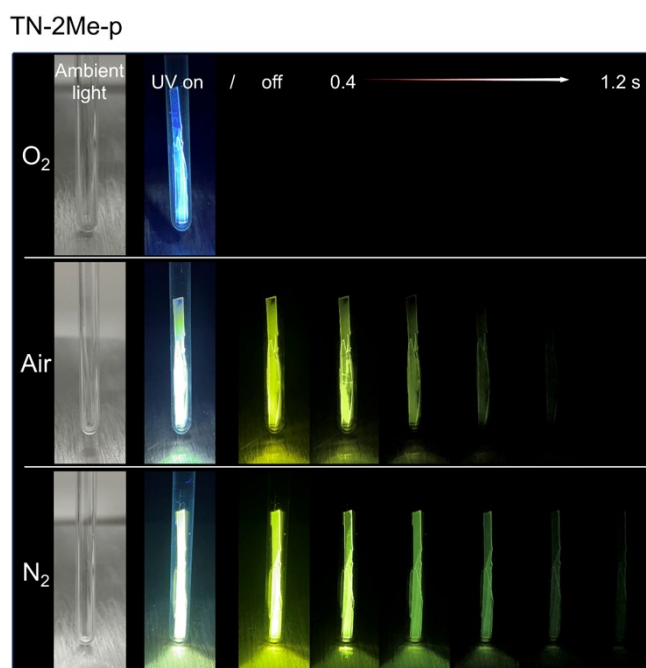

**Fig. S2** Comparison of photo-induced room-temperature phosphorescence characteristics of doped films TN-2Me-p in nitrogen versus oxygen environments. Samples exposed to an oxygen atmosphere exhibit significantly reduced UV light activation efficiency.

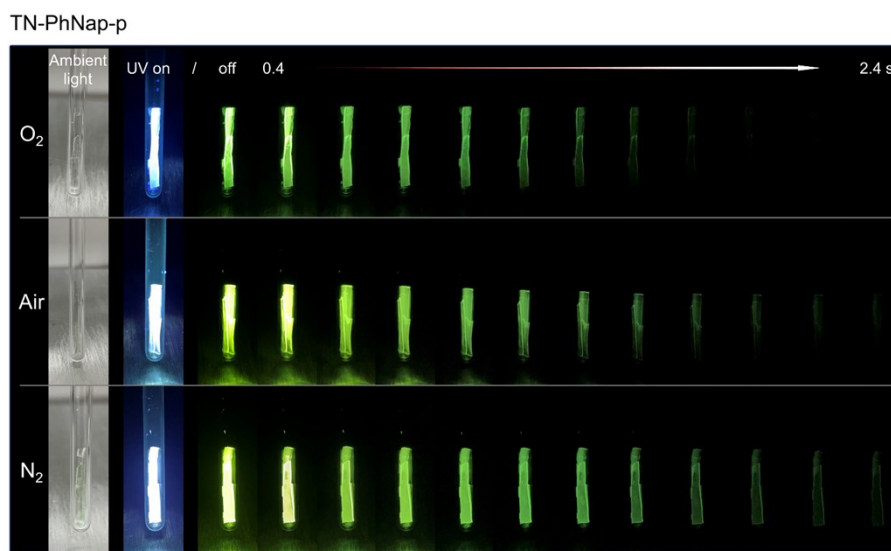

**Fig. S3** Comparison of photo-induced room-temperature phosphorescence characteristics of doped films TN-PhNap-p in nitrogen versus oxygen environments. Samples exposed to an oxygen atmosphere exhibit significantly reduced UV light activation efficiency.

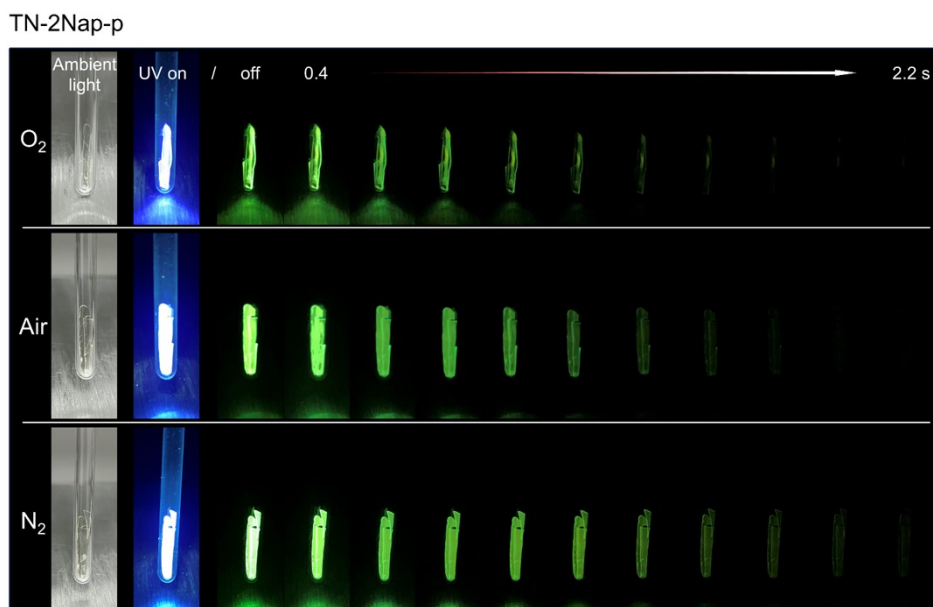

**Fig. S4** Comparison of photo-induced room-temperature phosphorescence characteristics of doped films TN-2Nap-p in nitrogen versus oxygen environments. Samples exposed to an oxygen atmosphere exhibit significantly reduced UV light activation efficiency.

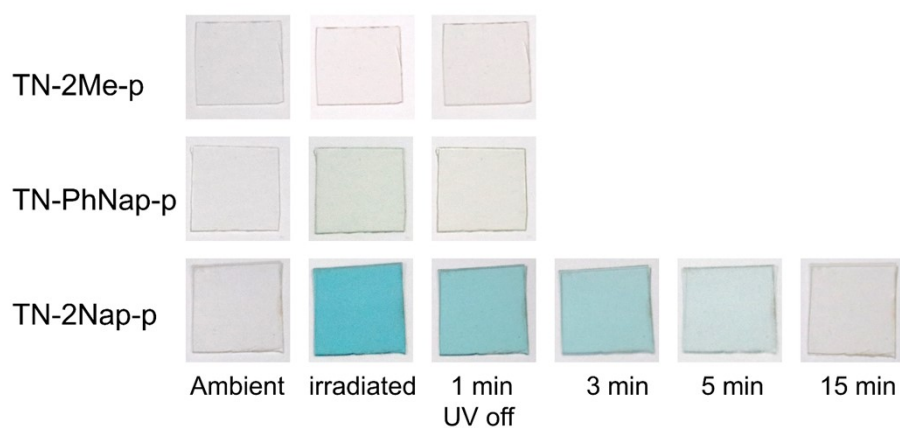

**Fig. S5** Photographs of the photochromic recovery process.

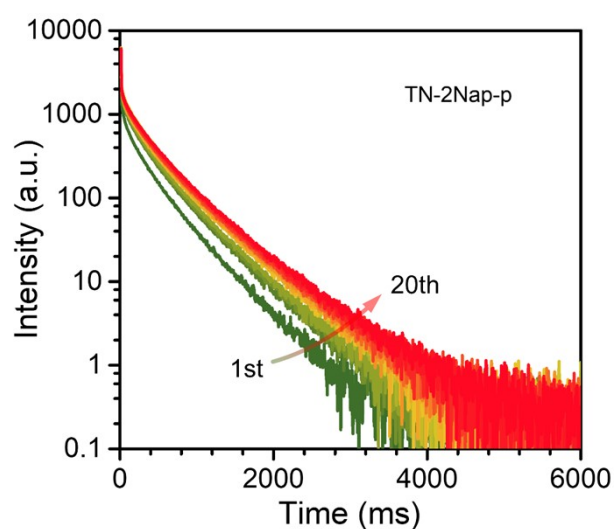

**Fig. S6** Photoluminescence decay curves of TN-2Nap-p measured for each cycle from the 1st to the 20th. Before capturing and recording each afterglow decay curve, the doped film was continuously irradiated with UV light for 30 seconds.

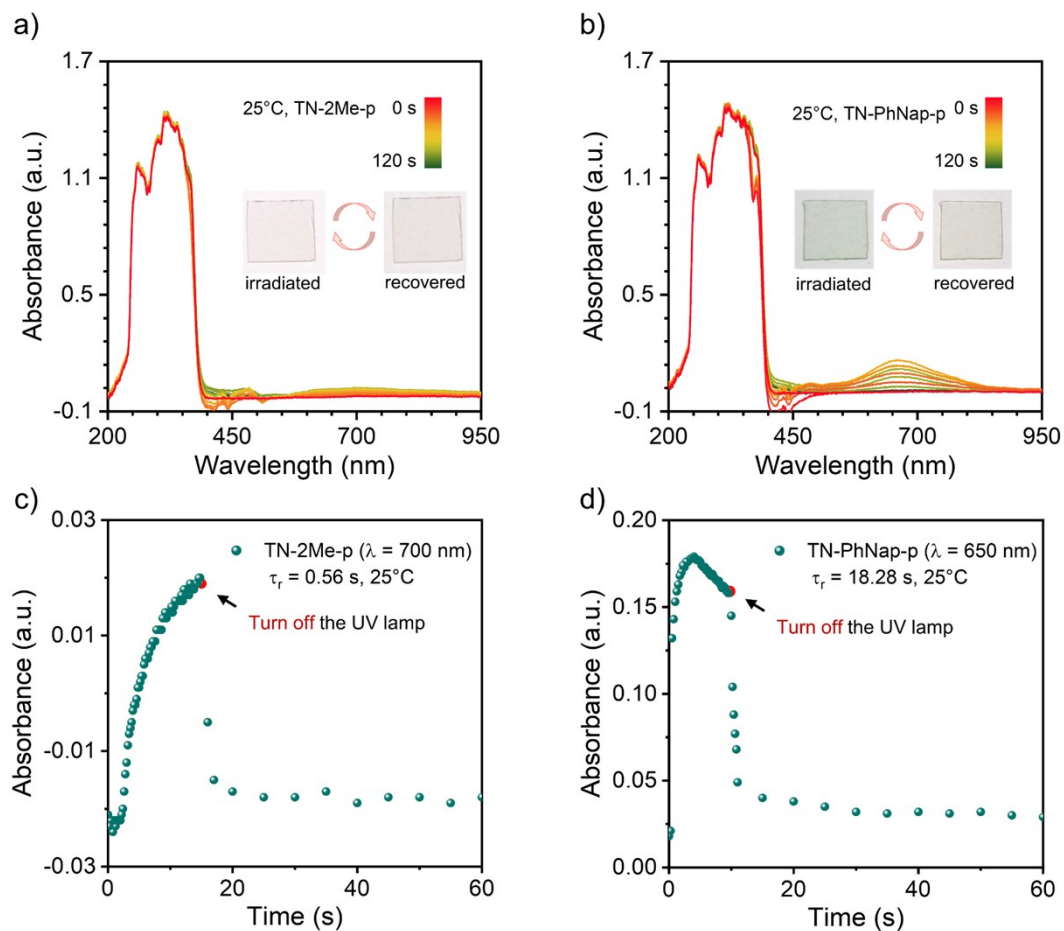

**Fig. S7** In situ monitoring of absorption spectra and absorbance decay curves of (a, c) TN-2Me-p, (b, d) TN-PhNap-p during continuous exposure to 365 nm UV light ( $500 \mu\text{W cm}^{-2}$ ) and subsequent recovery in air after the UV source is turned off, recorded at temperatures of 25 °C.



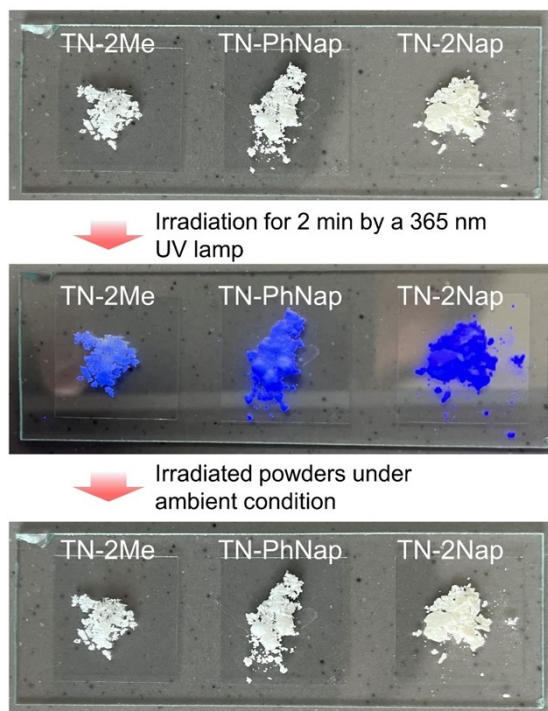

**Fig. S8** The photographs of the powders (TN-2Me, TN-PhNap and TN-2Nap) before and after under continuous UV irradiation.

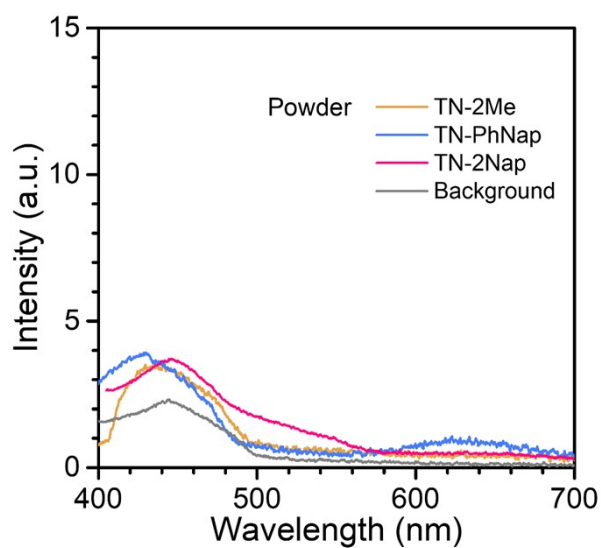

**Fig. S9** Delayed PL spectra of the powders TN-2Me, TN-PhNap, and TN-2Nap (Excitation slit: 20 nm. Emission slit: 20 nm).

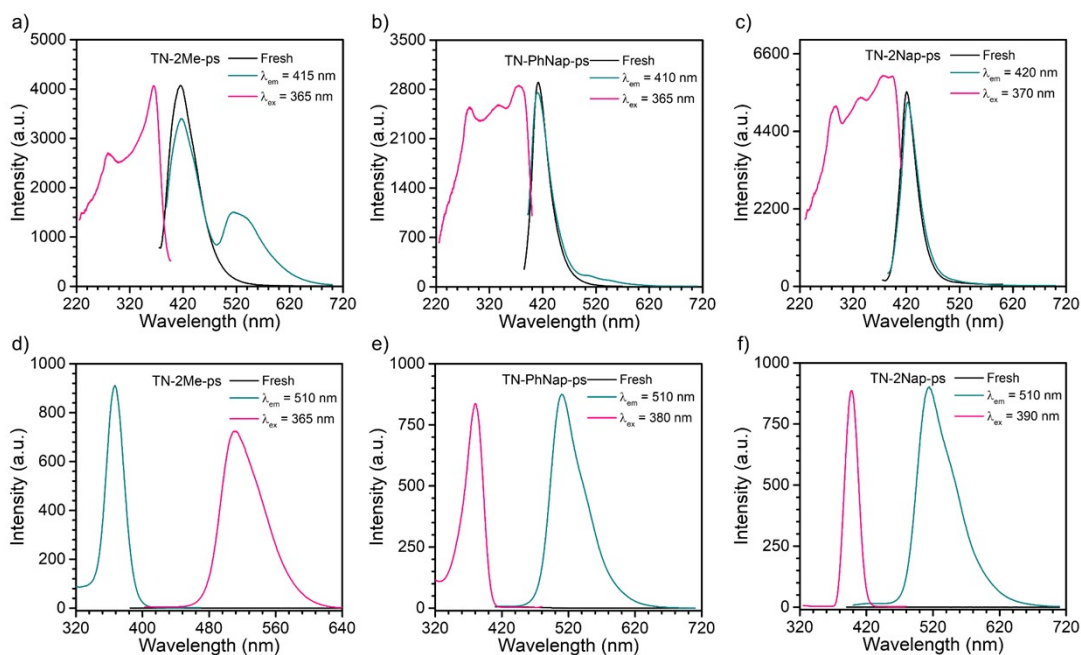

**Fig. S10** (a), (b), (c) Excitation and steady-state PL spectra (before/after UV irradiation) of TN-2Me, TN-PhNap, and TN-2Nap doped in polystyrene (TN-2Me-ps, TN-PhNap-ps, and TN-2Nap-ps). (d), (e), (f) Excitation and delayed (1.0 ms) PL spectra of TN-2Me-ps, TN-PhNap-ps, and TN-2Nap-ps before/after UV irradiation.

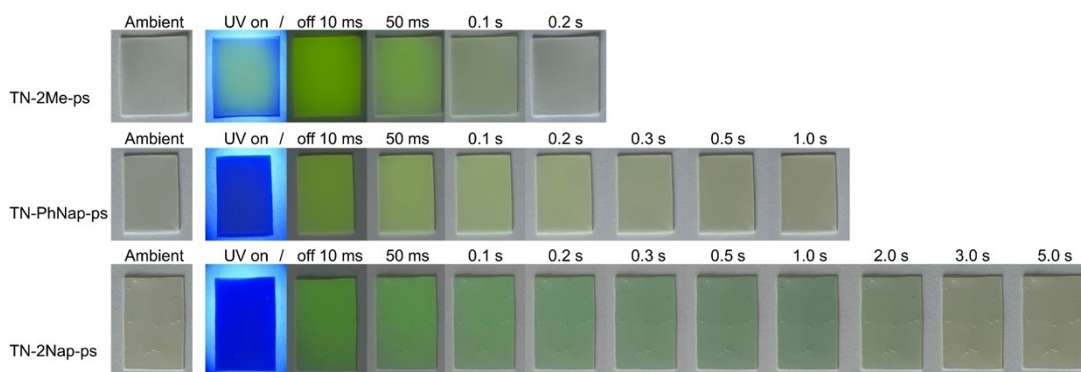

**Fig. S11** Comparison of photochromic images of doped films based on polystyrene matrix (TN-2Me-ps, TN-PhNap-ps and TN-2Nap-ps), taken under bright field conditions.

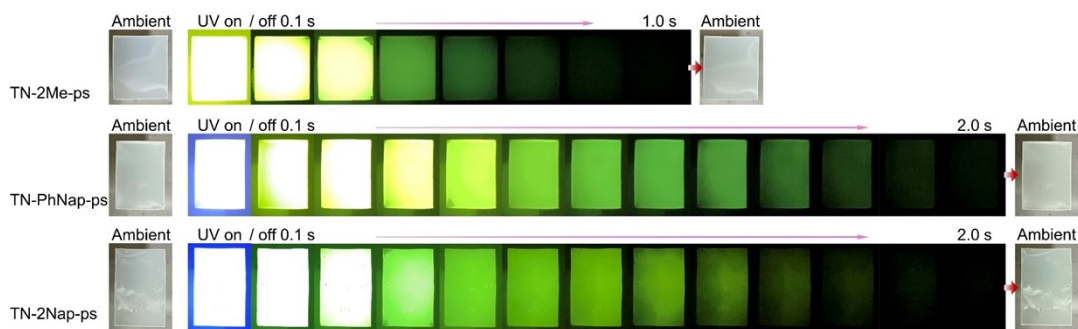

**Fig. S12** Comparison of afterglow properties of the doped films with a polystyrene matrix (TN-2Me-ps, TN-PhNap-ps and TN-2Nap-ps). The afterglow of the films was photographed under dark field conditions.

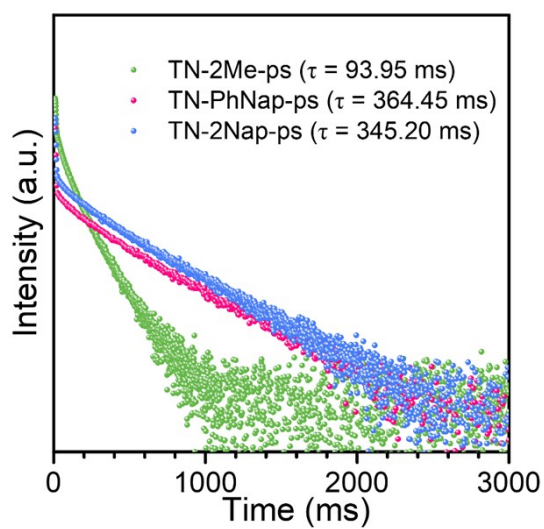

**Fig. S13** PL intensity decay curves of TN-2Me-ps, TN-PhNap-ps, and TN-2Nap-ps.

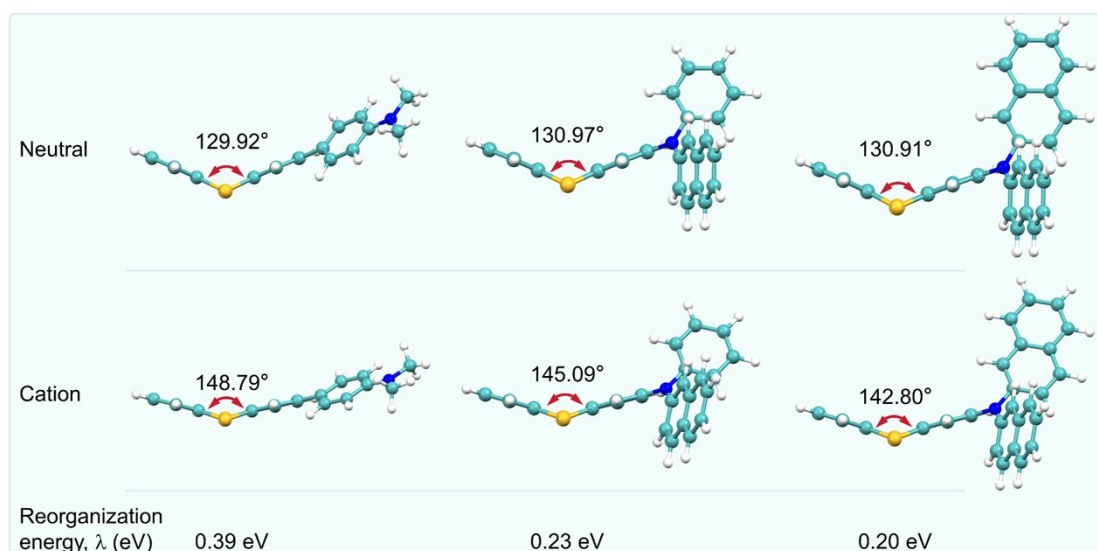

**Fig. S14** Optimized molecular structures of the neutral and radical cation states for TN-2Me, TN-PhNap, and TN-2Nap. The calculated reorganization energies ( $\lambda$ ) for the photo-generated radical processes are 0.39 eV, 0.23 eV, and 0.2 eV, respectively.

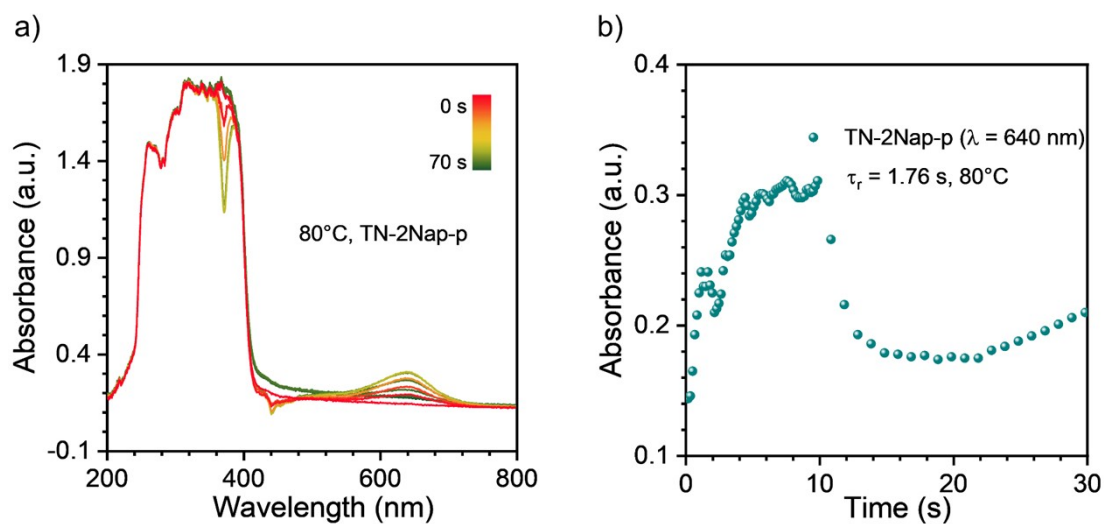

**Fig. S15** In situ monitoring of absorption spectra and absorbance decay curves of TN-2Nap-p during continuous exposure to 365 nm UV light ( $500 \mu\text{W cm}^{-2}$ ) and subsequent recovery in air after the UV source is turned off, recorded at temperatures of  $80^\circ\text{C}$ .

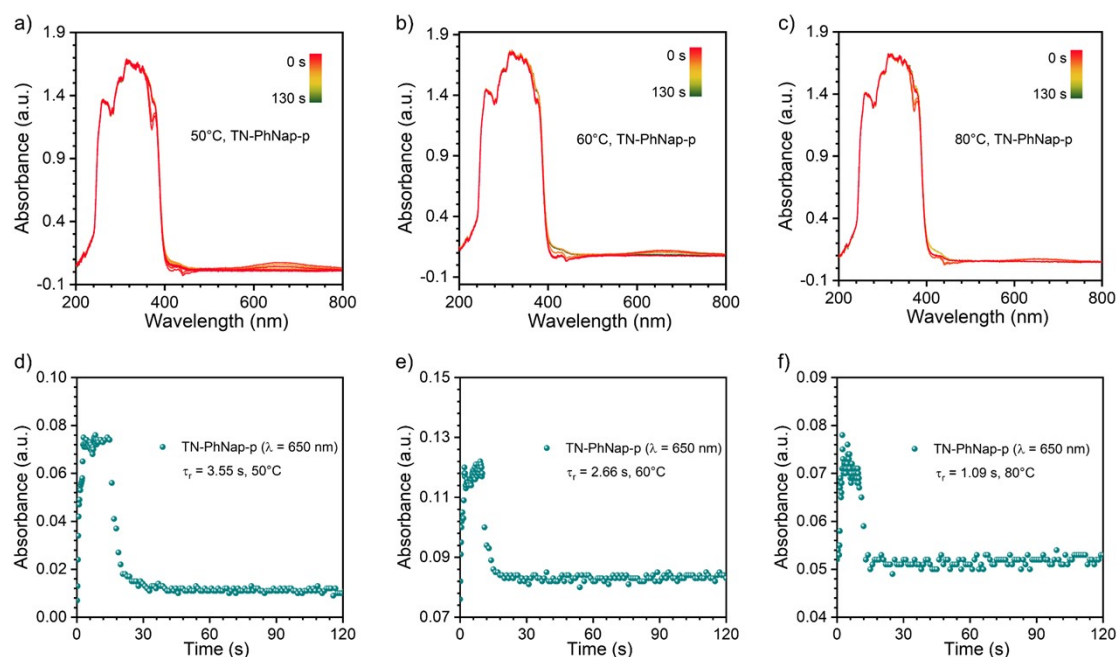

**Fig. S16** In situ monitoring of absorption spectra and absorbance decay curves of TN-PhNap-p during continuous exposure to 365 nm UV light ( $500 \mu\text{W cm}^{-2}$ ) and subsequent recovery in air after the UV source is turned off, recorded at temperatures of 50 °C, 60 °C, and 80 °C.

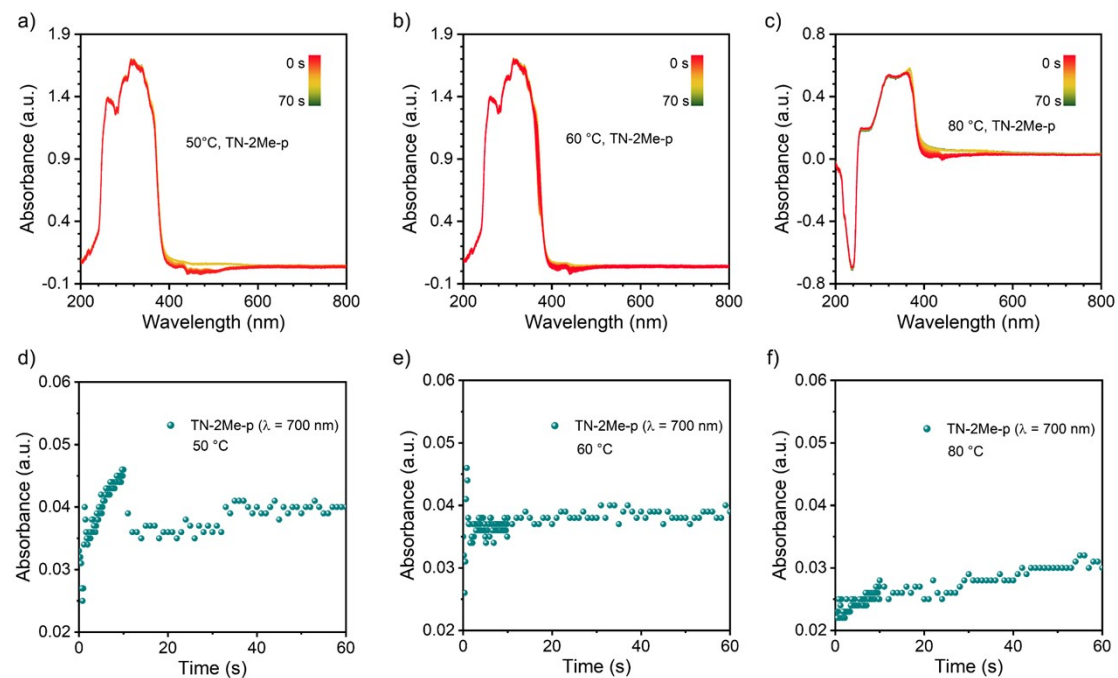

**Fig. S17** In situ monitoring of absorption spectra and absorbance decay curves of TN-2Me-p during continuous exposure to 365 nm UV light ( $500 \mu\text{W cm}^{-2}$ ) and subsequent recovery in air after the UV source is turned off, recorded at temperatures of 50 °C, 60 °C, and 80 °C.

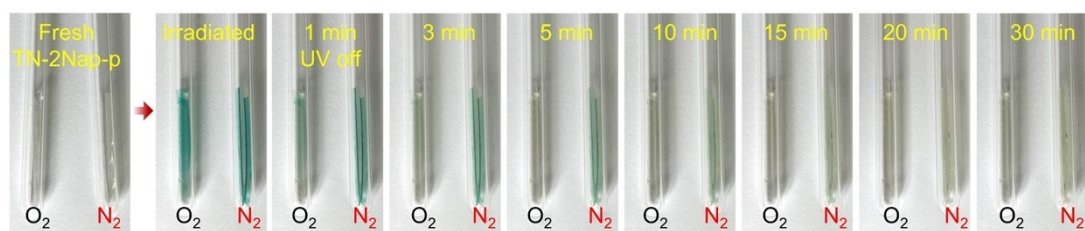

**Fig. S18** Photographs of the photochromic recovery process of TN-2Nap-p films in nitrogen and oxygen atmospheres.

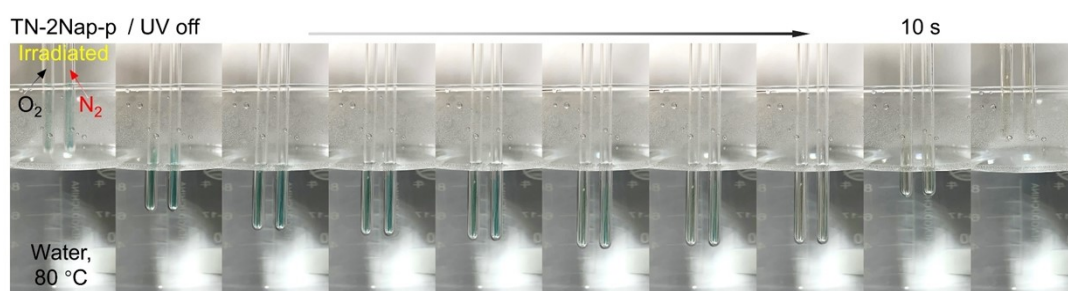

**Fig. S19** Rapid fading process of the photochromic TN-2Nap-p films encapsulated in nitrogen and oxygen atmospheres after continuous UV irradiation. Samples were sealed in quartz tubes and immersed in 80°C water, resulting in complete fading within ~10 seconds.

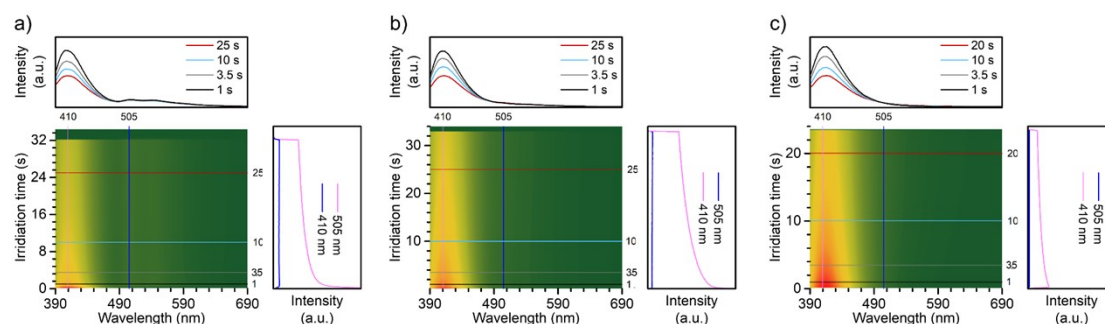

**Fig. S20** The in-suit monitoring of changed steady-state PL spectra of TN-PhNap-p with different temperature (a) 25 °C, (b) 60 °C, (c) 100 °C. (PL spectra were collected by QE65 Pro. Mode: high-speed scanning).

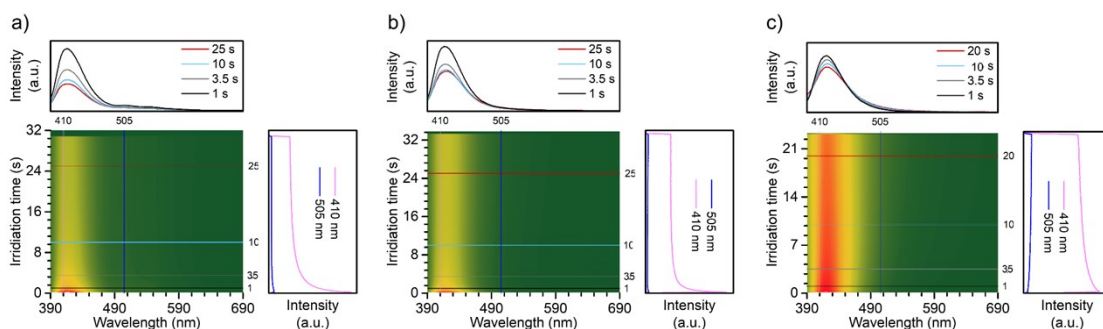

**Fig. S21** The in-suit monitoring of changed steady-state PL spectra of TN-2Nap-p with different temperature (a) 25 °C, (b) 60 °C, (c) 100 °C. (PL spectra were collected by QE65 Pro. Mode: high-speed scanning).

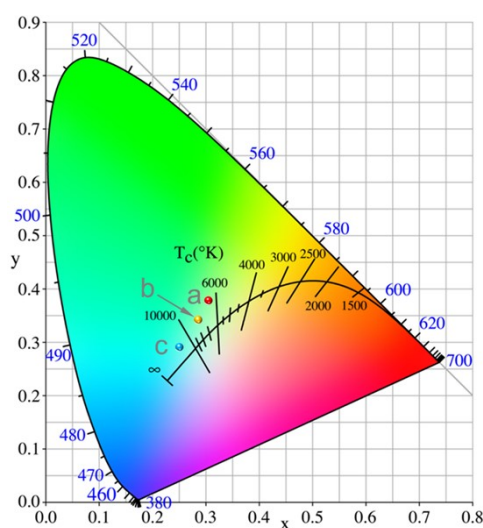

**Fig. S22** The CIE 1931 coordinates of TN-2Me-doped PMMA film at various temperatures: 25 °C, a (0.30, 0.38); 60 °C, b (0.29, 0.34); 100 °C, c (0.25, 0.29).

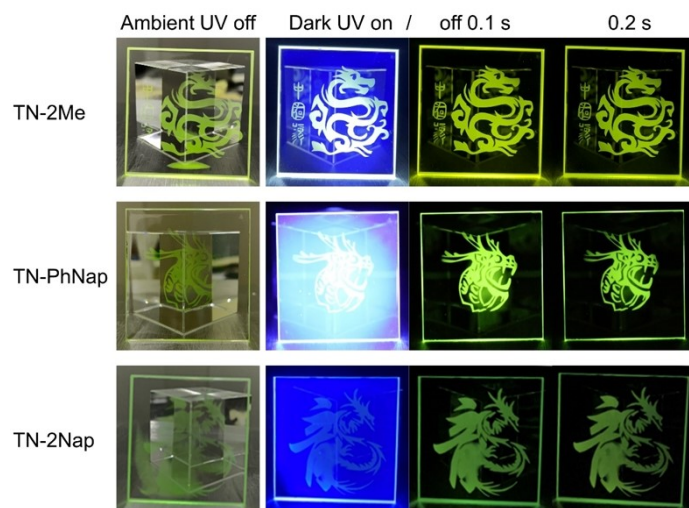

**Fig. S23** Phosphorescent outputs of localized activation of the RTP patterns by UV light through masks (film size, 50 mm × 50 mm × 0.7 mm).

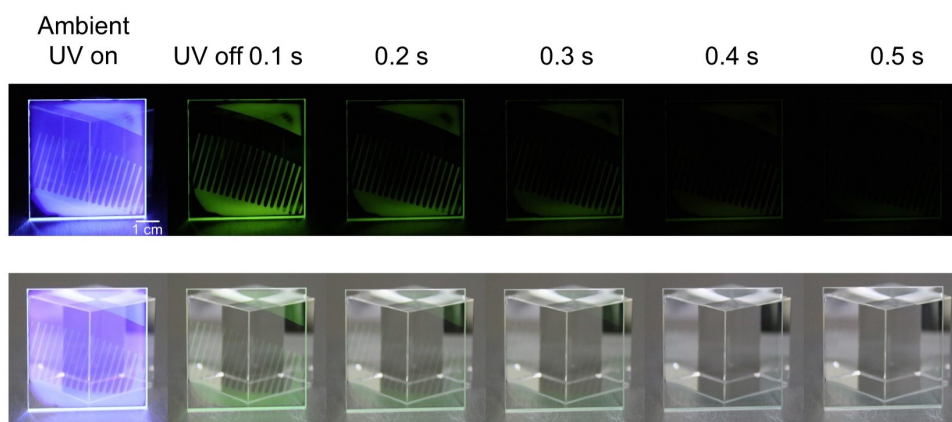

**Fig. S24** High-resolution display of thin films (TN-2Me-p).



**Table S1.** The odd electron density distribution of TN-2Me.

| Atomic space | Value    | % of sum <sup>a</sup> | % of sum abs <sup>b</sup> | Isosurface graph (odd electron density) <sup>c</sup> |
|--------------|----------|-----------------------|---------------------------|------------------------------------------------------|
| 1(C)         | 0.001164 | 0.056046              | 0.056046                  |                                                      |
| 2(C)         | 0.001827 | 0.087948              | 0.087948                  |                                                      |
| 3(C)         | 0.003037 | 0.146167              | 0.146167                  |                                                      |
| 4(C)         | 0.01114  | 0.536153              | 0.536153                  |                                                      |
| 5(C)         | 0.003844 | 0.184991              | 0.184991                  |                                                      |
| 6(C)         | 0.001175 | 0.056547              | 0.056547                  |                                                      |
| 7(S)         | 0.084771 | 4.079965              | 4.079965                  |                                                      |
| 8(C)         | 0.23509  | 11.31471              | 11.314707                 |                                                      |
| 9(C)         | 0.078312 | 3.769114              | 3.769114                  |                                                      |
| 10(S)        | 0.01917  | 0.922622              | 0.922622                  |                                                      |
| 11(C)        | 0.080741 | 3.886017              | 3.886017                  |                                                      |
| 12(C)        | 0.157698 | 7.58987               | 7.58987                   |                                                      |
| 13(C)        | 0.200896 | 9.668993              | 9.668993                  |                                                      |
| 14(C)        | 0.149674 | 7.203708              | 7.203708                  | H38                                                  |
| 15(C)        | 0.2104   | 10.1264               | 10.126404                 |                                                      |
| 16(C)        | 0.129132 | 6.215035              | 6.215035                  | H32                                                  |
| 17(C)        | 0.083426 | 4.015228              | 4.015228                  |                                                      |
| 18(C)        | 0.171122 | 8.235974              | 8.235974                  | H31                                                  |
| 19(C)        | 0.083807 | 4.033548              | 4.033548                  |                                                      |
| 20(C)        | 0.128407 | 6.180122              | 6.180122                  | H29                                                  |
| 21(N)        | 0.16885  | 8.126614              | 8.126614                  |                                                      |
| 22(C)        | 0.012108 | 0.582742              | 0.582742                  | H28                                                  |
| 23(C)        | 0.012123 | 0.583456              | 0.583456                  |                                                      |
| 24(H)        | 7.84E-05 | 0.003772              | 0.003772                  |                                                      |
| 25(H)        | 0.000286 | 0.01376               | 0.01376                   |                                                      |
| 26(H)        | 0.000272 | 0.013114              | 0.013114                  | H26                                                  |
| 27(H)        | 6.04E-05 | 0.002909              | 0.002909                  | C2                                                   |
| 28(H)        | 0.001636 | 0.078729              | 0.078729                  |                                                      |
| 29(H)        | 0.003619 | 0.174181              | 0.174181                  |                                                      |
| 30(H)        | 0.003422 | 0.164695              | 0.164695                  | H25                                                  |
| 31(H)        | 0.002914 | 0.140228              | 0.140228                  |                                                      |
| 32(H)        | 0.001546 | 0.074425              | 0.074425                  |                                                      |
| 33(H)        | 0.001555 | 0.074844              | 0.074844                  |                                                      |
| 34(H)        | 0.002882 | 0.138706              | 0.138706                  |                                                      |
| 35(H)        | 0.007835 | 0.377081              | 0.377081                  |                                                      |
| 36(H)        | 9.77E-05 | 0.0047                | 0.0047                    |                                                      |
| 37(H)        | 0.007836 | 0.377148              | 0.377148                  |                                                      |
| 38(H)        | 0.00784  | 0.377313              | 0.377313                  |                                                      |
| 39(H)        | 9.8E-05  | 0.004719              | 0.004719                  |                                                      |
| 40(H)        | 0.007848 | 0.377702              | 0.377702                  |                                                      |

<sup>a</sup> Summing up above values: 2.07773952<sup>b</sup> Summing up absolute value of above values: 2.07773952<sup>c</sup> The contour value is 0.01 a.u.

**Table S2.** The odd electron density distribution of TN-2Me<sup>+</sup>.

| Atomic space | Value    | % of sum <sup>a</sup> | % of sum abs <sup>b</sup> | Isosurface graph (odd electron density) <sup>c</sup> |
|--------------|----------|-----------------------|---------------------------|------------------------------------------------------|
| 1(C)         | 0.023607 | 2.360732              | 2.268116                  |                                                      |
| 2(C)         | 0.001806 | 0.180553              | 0.173469                  |                                                      |
| 3(C)         | 0.010272 | 1.027211              | 0.986912                  |                                                      |
| 4(C)         | 0.016959 | 1.695938              | 1.629403                  |                                                      |
| 5(C)         | 0.026588 | 2.658788              | 2.554479                  |                                                      |
| 6(C)         | -0.0077  | -0.77049              | -0.74027                  |                                                      |
| 7(S)         | 0.169452 | 16.94523              | 16.28044                  |                                                      |
| 8(C)         | 0.107517 | 10.75173              | 10.32992                  |                                                      |
| 9(C)         | 0.014422 | 1.442232              | 1.385651                  |                                                      |
| 10(S)        | 0.066702 | 6.670218              | 6.408534                  |                                                      |
| 11(C)        | -0.01037 | -1.03708              | -0.99639                  |                                                      |
| 12(C)        | 0.069963 | 6.996309              | 6.721832                  |                                                      |
| 13(C)        | 0.028835 | 2.883475              | 2.770352                  |                                                      |
| 14(C)        | 0.010493 | 1.049252              | 1.008088                  |                                                      |
| 15(C)        | 0.105713 | 10.57132              | 10.15659                  |                                                      |
| 16(C)        | 0.004982 | 0.49823               | 0.478684                  |                                                      |
| 17(C)        | 0.05397  | 5.396992              | 5.185259                  |                                                      |
| 18(C)        | 0.038255 | 3.825523              | 3.675441                  |                                                      |
| 19(C)        | 0.059373 | 5.937275              | 5.704346                  |                                                      |
| 20(C)        | 0.003956 | 0.395558              | 0.38004                   |                                                      |
| 21(N)        | 0.171807 | 17.18077              | 16.50674                  |                                                      |
| 22(C)        | 0.00099  | 0.099021              | 0.095136                  |                                                      |
| 23(C)        | 0.001025 | 0.102538              | 0.098516                  |                                                      |
| 24(H)        | -6.3E-05 | -0.0063               | -0.00605                  |                                                      |
| 25(H)        | 4.73E-05 | 0.004733              | 0.004547                  |                                                      |
| 26(H)        | -0.00022 | -0.02239              | -0.02152                  |                                                      |
| 27(H)        | -6.6E-05 | -0.00656              | -0.00631                  |                                                      |
| 28(H)        | -0.0003  | -0.03036              | -0.02917                  |                                                      |
| 29(H)        | -0.00055 | -0.05471              | -0.05256                  |                                                      |
| 30(H)        | -0.00024 | -0.02425              | -0.0233                   |                                                      |
| 31(H)        | -0.00033 | -0.03257              | -0.03129                  |                                                      |
| 32(H)        | -0.00014 | -0.01352              | -0.01299                  |                                                      |
| 33(H)        | -0.00012 | -0.0122               | -0.01172                  |                                                      |
| 34(H)        | -0.00031 | -0.03125              | -0.03003                  |                                                      |
| 35(H)        | 0.008773 | 0.877272              | 0.842855                  |                                                      |
| 36(H)        | 6.99E-05 | 0.00699               | 0.006716                  |                                                      |
| 37(H)        | 0.007976 | 0.797561              | 0.766271                  |                                                      |
| 38(H)        | 0.008837 | 0.883735              | 0.849065                  |                                                      |
| 39(H)        | 7.22E-05 | 0.007222              | 0.006938                  |                                                      |
| 40(H)        | 0.007953 | 0.795285              | 0.764084                  |                                                      |

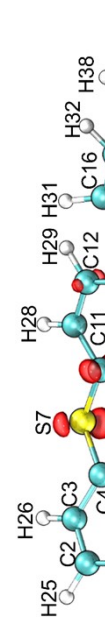<sup>a</sup> Summing up above values: 0.99999900<sup>b</sup> Summing up absolute value of above values: 1.04083260<sup>c</sup> The contour value is 0.01 a.u.

**Table S3.** The odd electron density distribution of TN-PhNap.

| Atomic space | Value    | % of sum <sup>a</sup> | % of sum abs <sup>b</sup> | Isosurface graph (odd electron density) <sup>c</sup> |
|--------------|----------|-----------------------|---------------------------|------------------------------------------------------|
| 1(C)         | 7.79E-05 | 0.003629              | 0.003629                  |                                                      |
| 2(C)         | 0.000112 | 0.005215              | 0.005215                  |                                                      |
| 3(C)         | 0.000296 | 0.013814              | 0.013814                  |                                                      |
| 4(C)         | 0.001113 | 0.051869              | 0.051869                  |                                                      |
| 5(C)         | 0.000299 | 0.013931              | 0.013931                  |                                                      |
| 6(C)         | 6.34E-05 | 0.002954              | 0.002954                  |                                                      |
| 7(S)         | 0.00916  | 0.426793              | 0.426793                  |                                                      |
| 8(C)         | 0.022528 | 1.049607              | 1.049607                  |                                                      |
| 9(C)         | 0.006077 | 0.283151              | 0.283151                  |                                                      |
| 10(S)        | 0.001552 | 0.072313              | 0.072313                  |                                                      |
| 11(C)        | 0.004741 | 0.220911              | 0.220911                  |                                                      |
| 12(C)        | 0.021479 | 1.000729              | 1.000729                  |                                                      |
| 13(C)        | 0.016861 | 0.785591              | 0.785591                  |                                                      |
| 14(C)        | 0.021854 | 1.018219              | 1.018219                  |                                                      |
| 15(N)        | 0.086539 | 4.032011              | 4.032011                  |                                                      |
| 16(C)        | 0.007048 | 0.328396              | 0.328396                  |                                                      |
| 17(C)        | 0.039306 | 1.831332              | 1.831332                  |                                                      |
| 18(C)        | 0.025558 | 1.190782              | 1.190782                  |                                                      |
| 19(C)        | 0.02021  | 0.941615              | 0.941615                  |                                                      |
| 20(C)        | 0.010698 | 0.498425              | 0.498425                  |                                                      |
| 21(C)        | 0.030002 | 1.397866              | 1.397866                  |                                                      |
| 22(C)        | 0.188575 | 8.786036              | 8.786036                  |                                                      |
| 23(C)        | 0.089416 | 4.166051              | 4.166051                  |                                                      |
| 24(C)        | 0.25031  | 11.6624               | 11.6624                   |                                                      |
| 25(C)        | 0.063675 | 2.966744              | 2.966744                  |                                                      |
| 26(C)        | 0.064262 | 2.994091              | 2.994091                  |                                                      |
| 27(C)        | 0.37393  | 17.4221               | 17.4221                   |                                                      |
| 28(C)        | 0.220653 | 10.28061              | 10.28061                  |                                                      |
| 29(C)        | 0.161065 | 7.504312              | 7.504312                  |                                                      |
| 30(C)        | 0.113866 | 5.305208              | 5.305208                  |                                                      |
| 31(C)        | 0.257703 | 12.00685              | 12.00685                  |                                                      |
| 32(H)        | 7.35E-06 | 0.000342              | 0.000342                  |                                                      |
| 33(H)        | 3.01E-05 | 0.001402              | 0.001402                  |                                                      |
| 34(H)        | 2.62E-05 | 0.001221              | 0.001221                  |                                                      |
| 35(H)        | 3.02E-06 | 0.000141              | 0.000141                  |                                                      |
| 36(H)        | 0.000165 | 0.007668              | 0.007668                  |                                                      |
| 37(H)        | 0.000418 | 0.019464              | 0.019464                  |                                                      |
| 38(H)        | 0.001179 | 0.054951              | 0.054951                  |                                                      |
| 39(H)        | 0.000404 | 0.0188                | 0.0188                    |                                                      |
| 40(H)        | 0.003237 | 0.150816              | 0.150816                  |                                                      |
| 41(H)        | 0.000394 | 0.018341              | 0.018341                  |                                                      |
| 42(H)        | 0.000336 | 0.015661              | 0.015661                  |                                                      |
| 43(H)        | 0.00082  | 0.038194              | 0.038194                  |                                                      |
| 44(H)        | 0.001726 | 0.080414              | 0.080414                  |                                                      |
| 45(H)        | 0.005724 | 0.266683              | 0.266683                  |                                                      |
| 46(H)        | 0.006875 | 0.320341              | 0.320341                  |                                                      |
| 47(H)        | 0.004709 | 0.219382              | 0.219382                  |                                                      |

---

|       |          |          |          |
|-------|----------|----------|----------|
| 48(H) | 0.003524 | 0.164196 | 0.164196 |
| 49(H) | 0.002288 | 0.106585 | 0.106585 |
| 50(H) | 0.005406 | 0.251857 | 0.251857 |

---

<sup>a</sup> Summing up above values: 2.14629889

<sup>b</sup> Summing up absolute value of above values: 2.14629889

<sup>c</sup> The contour value is 0.01 a.u.

---

**Table S4.** The odd electron density distribution of TN-PhNap<sup>+</sup>.

| Atomic space | Value    | % of sum <sup>a</sup> | % of sum abs <sup>b</sup> | Isosurface graph (odd electron density) <sup>c</sup>                                 |
|--------------|----------|-----------------------|---------------------------|--------------------------------------------------------------------------------------|
| 1(C)         | 0.016108 | 1.610834              | 1.334167                  | 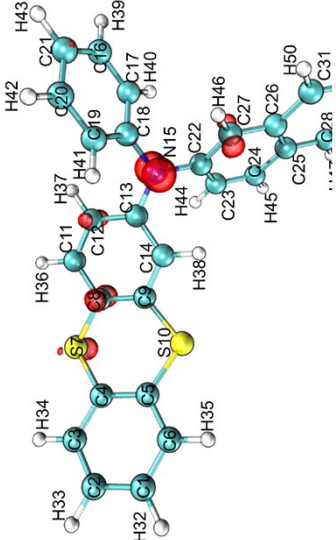 |
| 2(C)         | 0.000142 | 0.014183              | 0.011747                  |                                                                                      |
| 3(C)         | 0.008779 | 0.877857              | 0.727081                  |                                                                                      |
| 4(C)         | 0.011543 | 1.154332              | 0.956071                  |                                                                                      |
| 5(C)         | 0.016947 | 1.694727              | 1.403651                  |                                                                                      |
| 6(C)         | -0.00568 | -0.56776              | -0.47025                  |                                                                                      |
| 7(S)         | 0.139489 | 13.94889              | 11.55311                  |                                                                                      |
| 8(C)         | 0.11123  | 11.12296              | 9.212543                  |                                                                                      |
| 9(C)         | 0.001101 | 0.110074              | 0.091168                  |                                                                                      |
| 10(S)        | 0.037579 | 3.757891              | 3.112458                  |                                                                                      |
| 11(C)        | -0.0189  | -1.88956              | -1.56502                  |                                                                                      |
| 12(C)        | 0.080879 | 8.087864              | 6.69874                   |                                                                                      |
| 13(C)        | 0.015653 | 1.565282              | 1.296438                  |                                                                                      |
| 14(C)        | 0.033246 | 3.324616              | 2.7536                    |                                                                                      |
| 15(N)        | 0.219465 | 21.9465               | 18.1771                   |                                                                                      |
| 16(C)        | -0.01411 | -1.41074              | -1.16844                  |                                                                                      |
| 17(C)        | 0.04425  | 4.424965              | 3.664959                  |                                                                                      |
| 18(C)        | 0.002373 | 0.237258              | 0.196508                  |                                                                                      |
| 19(C)        | 0.043887 | 4.388745              | 3.63496                   |                                                                                      |
| 20(C)        | -0.01364 | -1.36359              | -1.12939                  |                                                                                      |
| 21(C)        | 0.056028 | 5.602834              | 4.640525                  |                                                                                      |
| 22(C)        | 0.010603 | 1.060331              | 0.878214                  |                                                                                      |
| 23(C)        | 0.018983 | 1.898301              | 1.57226                   |                                                                                      |
| 24(C)        | -0.00891 | -0.89123              | -0.73815                  |                                                                                      |
| 25(C)        | 0.032417 | 3.241686              | 2.684913                  |                                                                                      |
| 26(C)        | -0.00832 | -0.83219              | -0.68926                  |                                                                                      |
| 27(C)        | 0.101139 | 10.11393              | 8.376818                  |                                                                                      |
| 28(C)        | -0.0114  | -1.13994              | -0.94415                  |                                                                                      |
| 29(C)        | 0.054172 | 5.417162              | 4.486742                  |                                                                                      |
| 30(C)        | -0.01794 | -1.79426              | -1.48609                  |                                                                                      |
| 31(C)        | 0.046568 | 4.656847              | 3.857015                  |                                                                                      |
| 32(H)        | -7.6E-05 | -0.00756              | -0.00626                  |                                                                                      |
| 33(H)        | 9.67E-05 | 0.009667              | 0.008006                  |                                                                                      |
| 34(H)        | -0.00015 | -0.01543              | -0.01278                  |                                                                                      |
| 35(H)        | -3.9E-05 | -0.00387              | -0.0032                   |                                                                                      |
| 36(H)        | -2.3E-05 | -0.00233              | -0.00193                  |                                                                                      |
| 37(H)        | -0.00086 | -0.08576              | -0.07103                  |                                                                                      |
| 38(H)        | -0.00046 | -0.04554              | -0.03772                  |                                                                                      |
| 39(H)        | 0.0003   | 0.030037              | 0.024878                  |                                                                                      |
| 40(H)        | -0.00059 | -0.05854              | -0.04849                  |                                                                                      |
| 41(H)        | -0.00057 | -0.0566               | -0.04688                  |                                                                                      |
| 42(H)        | 0.000339 | 0.033857              | 0.028042                  |                                                                                      |
| 43(H)        | -0.00013 | -0.01317              | -0.01091                  |                                                                                      |
| 44(H)        | -0.00031 | -0.03074              | -0.02546                  |                                                                                      |
| 45(H)        | 0.000315 | 0.031481              | 0.026074                  |                                                                                      |
| 46(H)        | -0.00111 | -0.11111              | -0.09202                  |                                                                                      |
| 47(H)        | 4.15E-05 | 0.004145              | 0.003433                  |                                                                                      |

---

|       |          |          |          |
|-------|----------|----------|----------|
| 48(H) | -0.00013 | -0.01289 | -0.01068 |
| 49(H) | 0.000013 | 0.0013   | 0.001077 |
| 50(H) | -0.00036 | -0.03576 | -0.02962 |

---

<sup>a</sup> Summing up above values: 1.00000011

<sup>b</sup> Summing up absolute value of above values: 1.20737105

<sup>c</sup> The contour value is 0.01 a.u.

---

**Table S5.** The odd electron density distribution of TN-2Nap.

| Atomic space | Value    | % of sum <sup>a</sup> | % of sum abs <sup>b</sup> | Isosurface graph (odd electron density) <sup>c</sup>                                |
|--------------|----------|-----------------------|---------------------------|-------------------------------------------------------------------------------------|
| 1(C)         | 6.77E-05 | 0.003117              | 0.003117                  | 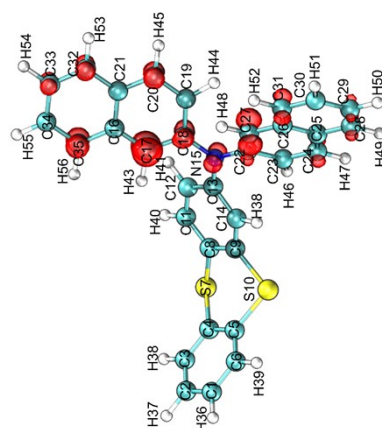 |
| 2(C)         | 0.00015  | 0.006881              | 0.006881                  |                                                                                     |
| 3(C)         | 0.000271 | 0.012462              | 0.012462                  |                                                                                     |
| 4(C)         | 0.000991 | 0.045606              | 0.045606                  |                                                                                     |
| 5(C)         | 0.000219 | 0.010066              | 0.010066                  |                                                                                     |
| 6(C)         | 5.36E-05 | 0.002467              | 0.002467                  |                                                                                     |
| 7(S)         | 0.007347 | 0.338026              | 0.338026                  |                                                                                     |
| 8(C)         | 0.019587 | 0.901217              | 0.901217                  |                                                                                     |
| 9(C)         | 0.005995 | 0.275858              | 0.275858                  |                                                                                     |
| 10(S)        | 0.0015   | 0.069012              | 0.069012                  |                                                                                     |
| 11(C)        | 0.004108 | 0.18901               | 0.18901                   |                                                                                     |
| 12(C)        | 0.027485 | 1.264617              | 1.264617                  |                                                                                     |
| 13(C)        | 0.017557 | 0.807834              | 0.807834                  |                                                                                     |
| 14(C)        | 0.019028 | 0.87552               | 0.87552                   |                                                                                     |
| 15(N)        | 0.091887 | 4.227801              | 4.227801                  |                                                                                     |
| 16(C)        | 0.044727 | 2.057951              | 2.057951                  |                                                                                     |
| 17(C)        | 0.253927 | 11.68344              | 11.68344                  |                                                                                     |
| 18(C)        | 0.138847 | 6.388491              | 6.388491                  |                                                                                     |
| 19(C)        | 0.062406 | 2.871372              | 2.871372                  |                                                                                     |
| 20(C)        | 0.137442 | 6.323851              | 6.323851                  |                                                                                     |
| 21(C)        | 0.046675 | 2.147563              | 2.147563                  |                                                                                     |
| 22(C)        | 0.087255 | 4.014704              | 4.014704                  |                                                                                     |
| 23(C)        | 0.041336 | 1.901912              | 1.901912                  |                                                                                     |
| 24(C)        | 0.093047 | 4.28119               | 4.28119                   |                                                                                     |
| 25(C)        | 0.032356 | 1.488714              | 1.488714                  |                                                                                     |
| 26(C)        | 0.030244 | 1.391556              | 1.391556                  |                                                                                     |
| 27(C)        | 0.178942 | 8.233328              | 8.233328                  |                                                                                     |
| 28(C)        | 0.085261 | 3.922955              | 3.922955                  |                                                                                     |
| 29(C)        | 0.078224 | 3.599154              | 3.599154                  |                                                                                     |
| 30(C)        | 0.047225 | 2.172894              | 2.172894                  |                                                                                     |
| 31(C)        | 0.110194 | 5.070139              | 5.070139                  |                                                                                     |
| 32(C)        | 0.126577 | 5.823967              | 5.823967                  |                                                                                     |
| 33(C)        | 0.114708 | 5.277847              | 5.277847                  |                                                                                     |
| 34(C)        | 0.068522 | 3.152772              | 3.152772                  |                                                                                     |
| 35(C)        | 0.162238 | 7.464731              | 7.464731                  |                                                                                     |
| 36(H)        | 4.58E-06 | 0.000211              | 0.000211                  |                                                                                     |
| 37(H)        | 2.72E-05 | 0.001252              | 0.001252                  |                                                                                     |
| 38(H)        | 2.55E-05 | 0.001173              | 0.001173                  |                                                                                     |
| 39(H)        | 2.63E-06 | 0.000121              | 0.000121                  |                                                                                     |
| 40(H)        | 0.000278 | 0.012779              | 0.012779                  |                                                                                     |
| 41(H)        | 0.001952 | 0.089823              | 0.089823                  |                                                                                     |
| 42(H)        | 0.000677 | 0.031141              | 0.031141                  |                                                                                     |
| 43(H)        | 0.004663 | 0.214531              | 0.214531                  |                                                                                     |
| 44(H)        | 0.002262 | 0.104067              | 0.104067                  |                                                                                     |
| 45(H)        | 0.00329  | 0.151382              | 0.151382                  |                                                                                     |
| 46(H)        | 0.000837 | 0.038525              | 0.038525                  |                                                                                     |
| 47(H)        | 0.002206 | 0.10148               | 0.10148                   |                                                                                     |

---

|       |          |          |          |
|-------|----------|----------|----------|
| 48(H) | 0.003719 | 0.17111  | 0.17111  |
| 49(H) | 0.001829 | 0.084141 | 0.084141 |
| 50(H) | 0.001801 | 0.082883 | 0.082883 |
| 51(H) | 0.000929 | 0.04276  | 0.04276  |
| 52(H) | 0.00237  | 0.109052 | 0.109052 |
| 53(H) | 0.00269  | 0.123792 | 0.123792 |
| 54(H) | 0.00266  | 0.122369 | 0.122369 |
| 55(H) | 0.001321 | 0.060785 | 0.060785 |
| 56(H) | 0.003447 | 0.158596 | 0.158596 |

---

<sup>a</sup> Summing up above values: 2.17338907

<sup>b</sup> Summing up absolute value of above values: 2.17338907

<sup>c</sup> The contour value is 0.01 a.u.

---



**Table S6.** The odd electron density distribution of TN-2Nap<sup>+</sup>.

| Atomic space | Value    | % of sum <sup>a</sup> | % of sum abs <sup>b</sup> | Isosurface graph (odd electron density) <sup>c</sup> |
|--------------|----------|-----------------------|---------------------------|------------------------------------------------------|
| 1(C)         | 0.011792 | 1.179191              | 0.939829                  |                                                      |
| 2(C)         | 0.000301 | 0.03007               | 0.023967                  |                                                      |
| 3(C)         | 0.006802 | 0.6802                | 0.542127                  |                                                      |
| 4(C)         | 0.009433 | 0.943256              | 0.751786                  |                                                      |
| 5(C)         | 0.012465 | 1.246495              | 0.993471                  |                                                      |
| 6(C)         | -0.00421 | -0.42071              | -0.33531                  |                                                      |
| 7(S)         | 0.116157 | 11.61564              | 9.2578                    |                                                      |
| 8(C)         | 0.100667 | 10.06665              | 8.023239                  |                                                      |
| 9(C)         | 0.000145 | 0.014456              | 0.011521                  |                                                      |
| 10(S)        | 0.029113 | 2.911248              | 2.320298                  |                                                      |
| 11(C)        | -0.0211  | -2.11034              | -1.68197                  |                                                      |
| 12(C)        | 0.076987 | 7.698665              | 6.135925                  |                                                      |
| 13(C)        | 0.012751 | 1.275111              | 1.016278                  |                                                      |
| 14(C)        | 0.033954 | 3.395363              | 2.706144                  |                                                      |
| 15(N)        | 0.222458 | 22.24577              | 17.73014                  |                                                      |
| 16(C)        | -0.00807 | -0.80723              | -0.64337                  |                                                      |
| 17(C)        | 0.095346 | 9.534588              | 7.599177                  |                                                      |
| 18(C)        | 0.010167 | 1.016683              | 0.810308                  |                                                      |
| 19(C)        | 0.020204 | 2.020425              | 1.610302                  |                                                      |
| 20(C)        | -0.01129 | -1.12925              | -0.90002                  |                                                      |
| 21(C)        | 0.03177  | 3.176947              | 2.532063                  |                                                      |
| 22(C)        | 0.005867 | 0.586717              | 0.467621                  |                                                      |
| 23(C)        | 0.020583 | 2.058329              | 1.640512                  |                                                      |
| 24(C)        | -0.01177 | -1.17722              | -0.93826                  |                                                      |
| 25(C)        | 0.031683 | 3.168296              | 2.525169                  |                                                      |
| 26(C)        | -0.00747 | -0.74685              | -0.59525                  |                                                      |
| 27(C)        | 0.094386 | 9.438538              | 7.522624                  |                                                      |
| 28(C)        | -0.01239 | -1.23916              | -0.98763                  |                                                      |
| 29(C)        | 0.049945 | 4.994497              | 3.980672                  |                                                      |
| 30(C)        | -0.01667 | -1.66707              | -1.32868                  |                                                      |
| 31(C)        | 0.041821 | 4.18213               | 3.333206                  |                                                      |
| 32(C)        | -0.0125  | -1.25028              | -0.99649                  |                                                      |
| 33(C)        | 0.049753 | 4.975263              | 3.965342                  |                                                      |
| 34(C)        | -0.01668 | -1.66818              | -1.32956                  |                                                      |
| 35(C)        | 0.041908 | 4.190812              | 3.340125                  |                                                      |
| 36(H)        | -0.00006 | -0.006                | -0.00478                  |                                                      |
| 37(H)        | 0.000101 | 0.010055              | 0.008014                  |                                                      |
| 38(H)        | -0.00011 | -0.01139              | -0.00908                  |                                                      |
| 39(H)        | -3.5E-05 | -0.00353              | -0.00281                  |                                                      |
| 40(H)        | 5.9E-05  | 0.005899              | 0.004701                  |                                                      |
| 41(H)        | -0.0009  | -0.08973              | -0.07151                  |                                                      |
| 42(H)        | -0.00048 | -0.04773              | -0.03804                  |                                                      |
| 43(H)        | -0.00111 | -0.11099              | -0.08846                  |                                                      |
| 44(H)        | -0.0003  | -0.03021              | -0.02408                  |                                                      |
| 45(H)        | 0.000289 | 0.028926              | 0.023054                  |                                                      |
| 46(H)        | -0.00032 | -0.03208              | -0.02557                  |                                                      |
| 47(H)        | 0.000307 | 0.030731              | 0.024493                  |                                                      |

---

|       |          |          |          |
|-------|----------|----------|----------|
| 48(H) | -0.00099 | -0.09923 | -0.07909 |
| 49(H) | 4.9E-05  | 0.004898 | 0.003904 |
| 50(H) | -0.00011 | -0.01113 | -0.00887 |
| 51(H) | 1.67E-05 | 0.001669 | 0.00133  |
| 52(H) | -0.00033 | -0.03334 | -0.02657 |
| 53(H) | 5.09E-05 | 0.005086 | 0.004054 |
| 54(H) | -0.00011 | -0.01129 | -0.009   |
| 55(H) | 1.74E-05 | 0.001735 | 0.001383 |
| 56(H) | -0.00031 | -0.03143 | -0.02505 |

---

<sup>a</sup> Summing up above values: 1.00000120

<sup>b</sup> Summing up absolute value of above values: 1.25468843

<sup>c</sup> The contour value is 0.01 a.u.

---

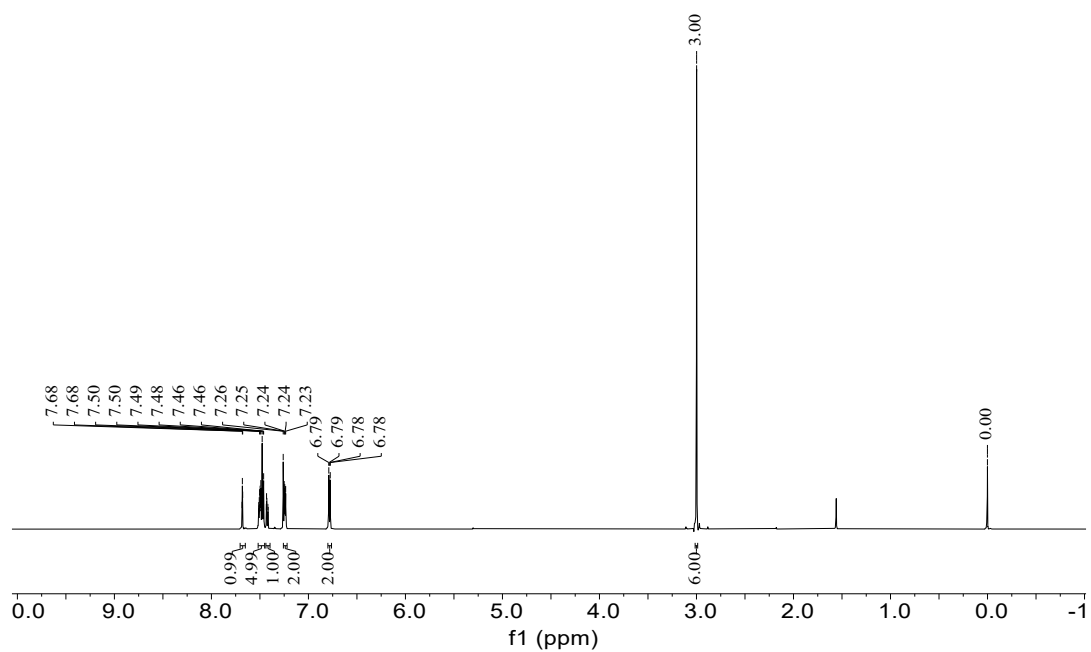

**Fig. S25** The <sup>1</sup>H NMR spectrum of compound TN-2Me in CDCl<sub>3</sub>

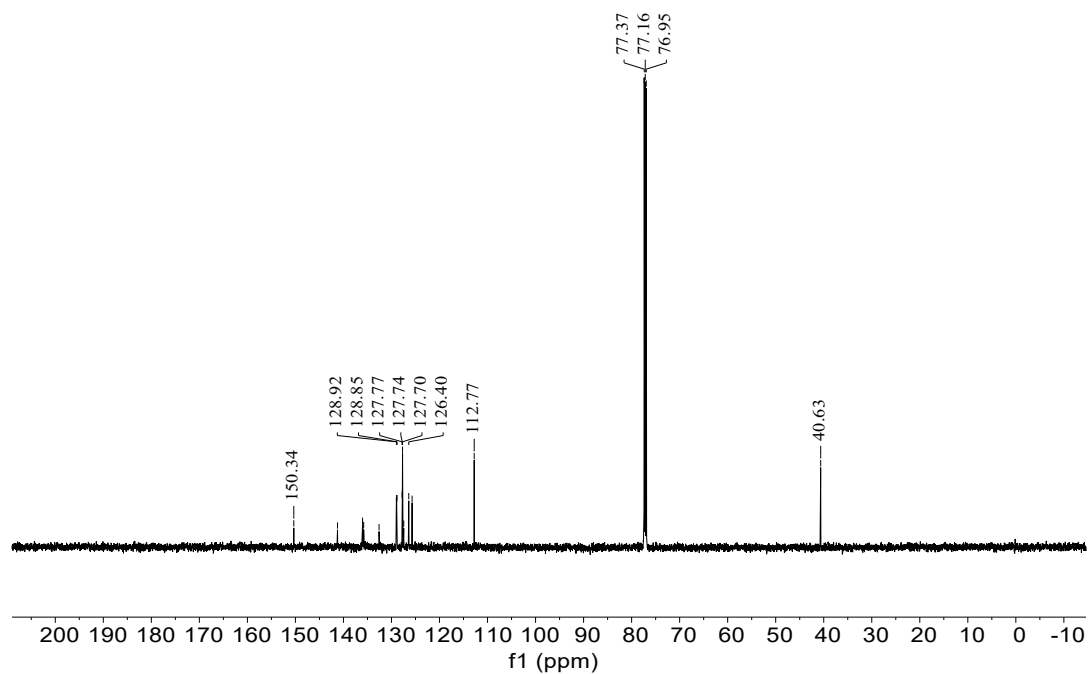

**Fig. S26** The <sup>13</sup>C NMR spectrum of compound TN-2Me in CDCl<sub>3</sub>

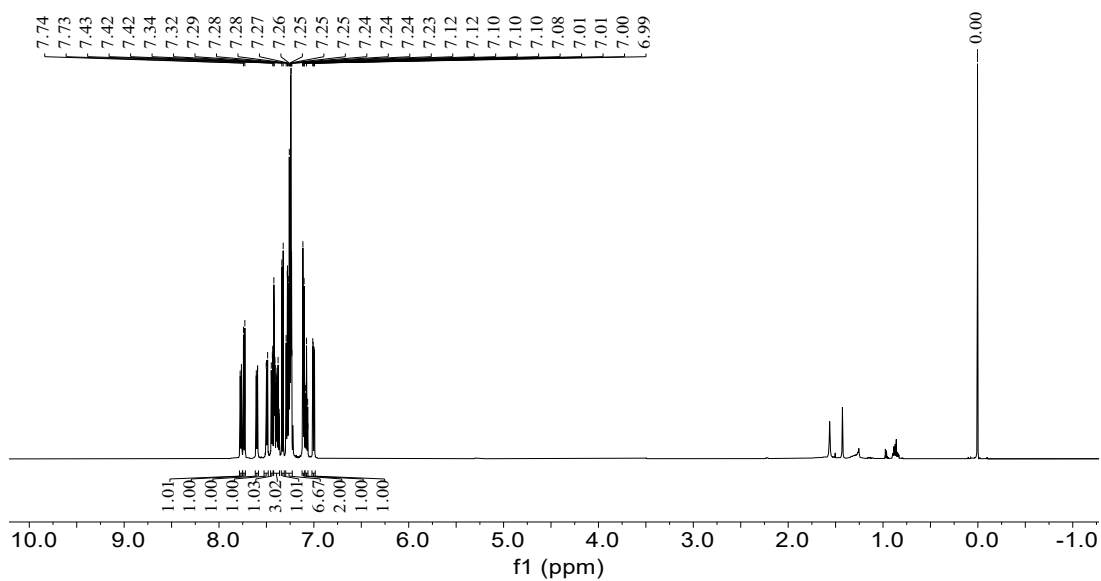

Fig. S27 The  $^1\text{H}$  NMR spectrum of compound TN-PhNap in  $\text{CDCl}_3$

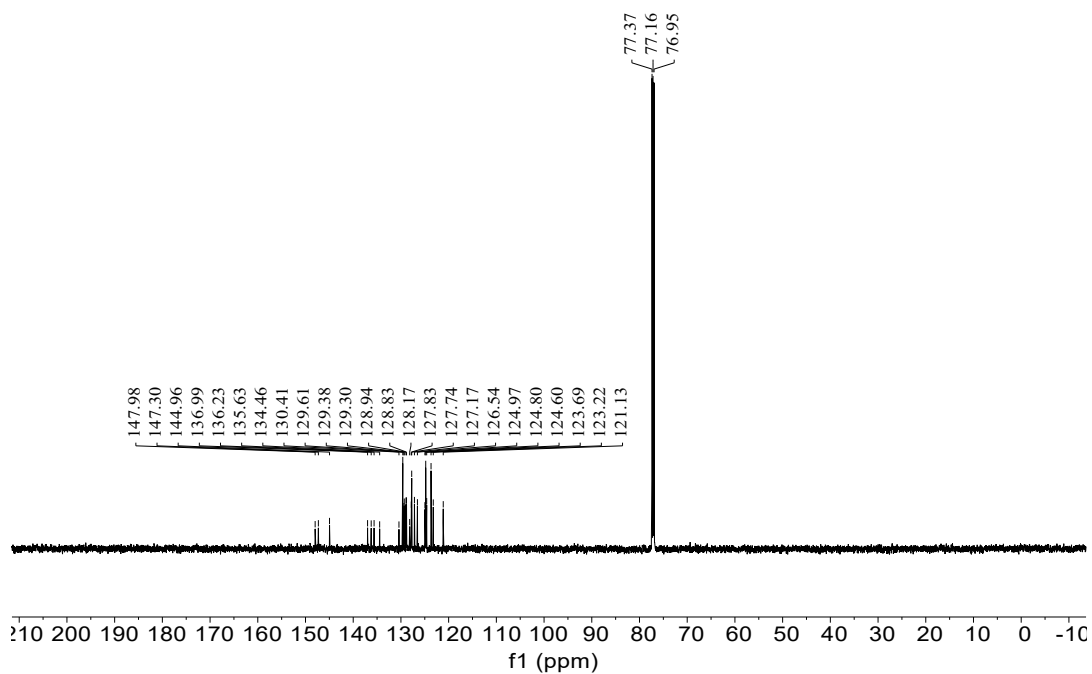

Fig. S28 The  $^{13}\text{C}$  NMR spectrum of compound TN-PhNap in  $\text{CDCl}_3$

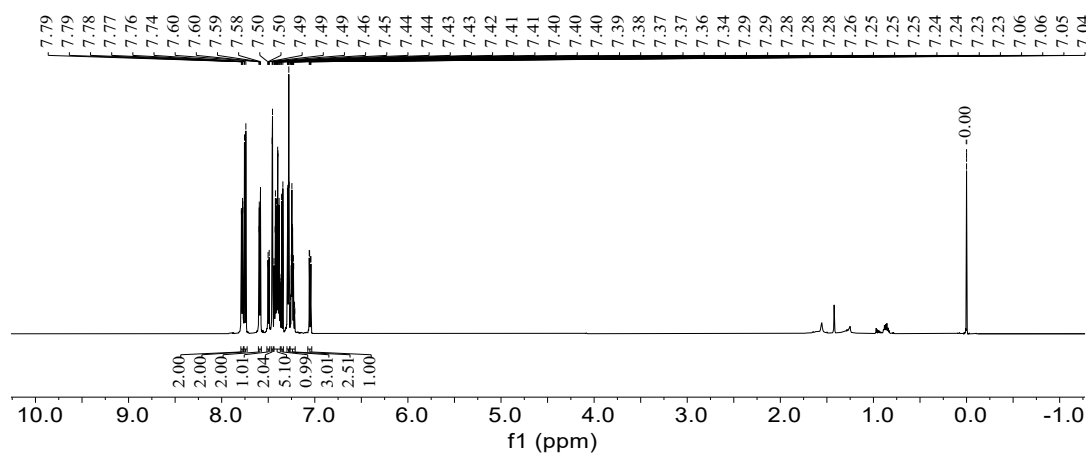

Fig. S29 The  $^1\text{H}$  NMR spectrum of compound TN-2Nap in  $\text{CDCl}_3$

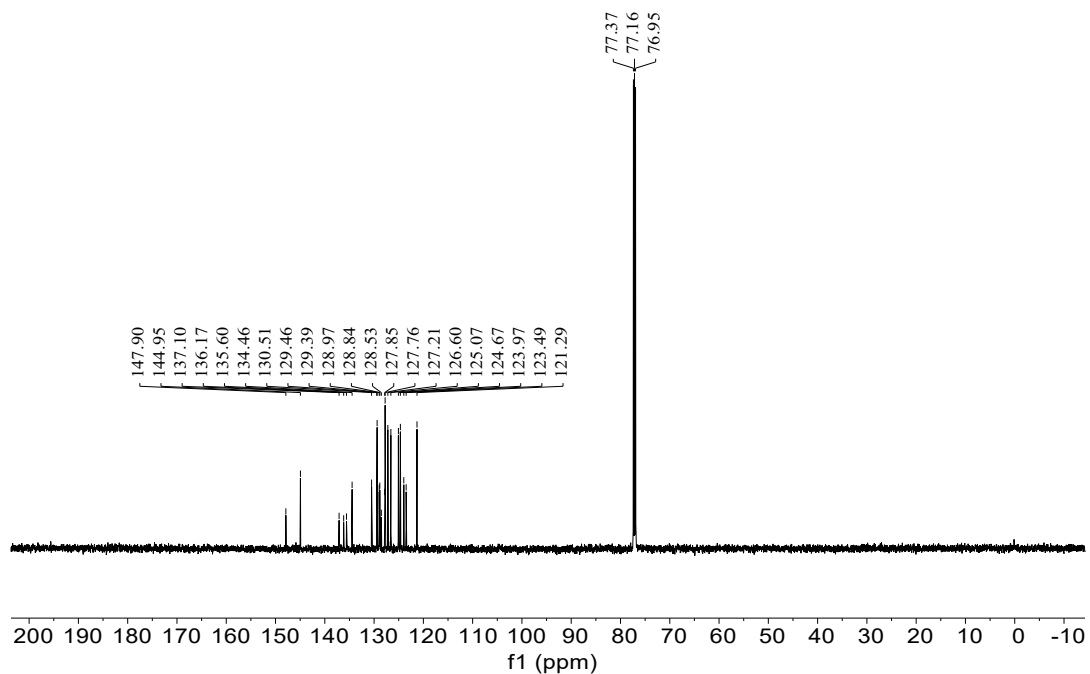

Fig. S30 The  $^{13}\text{C}$  NMR spectrum of compound TN-2Nap in  $\text{CDCl}_3$

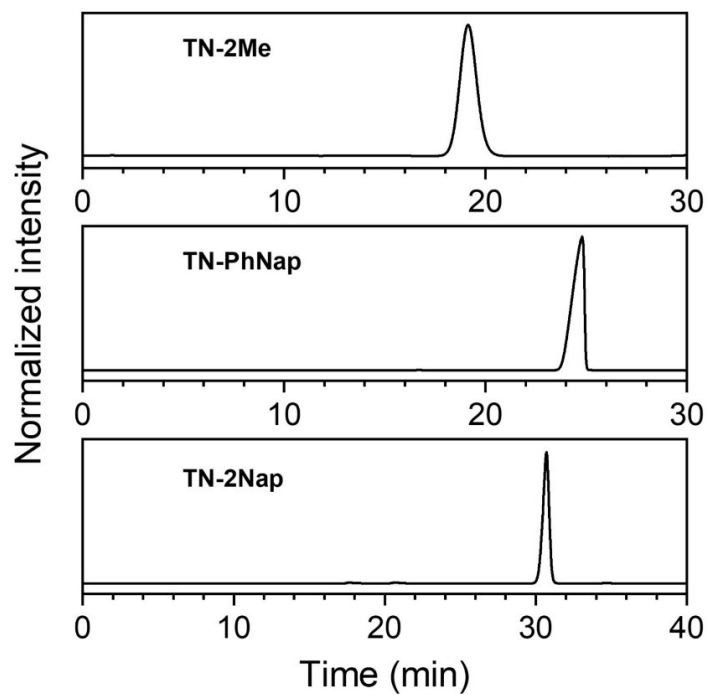

**Fig. S31** High performance liquid chromatogram (HPLC) spectra of TN-2Me, TN-PhNap and TN-2Nap.

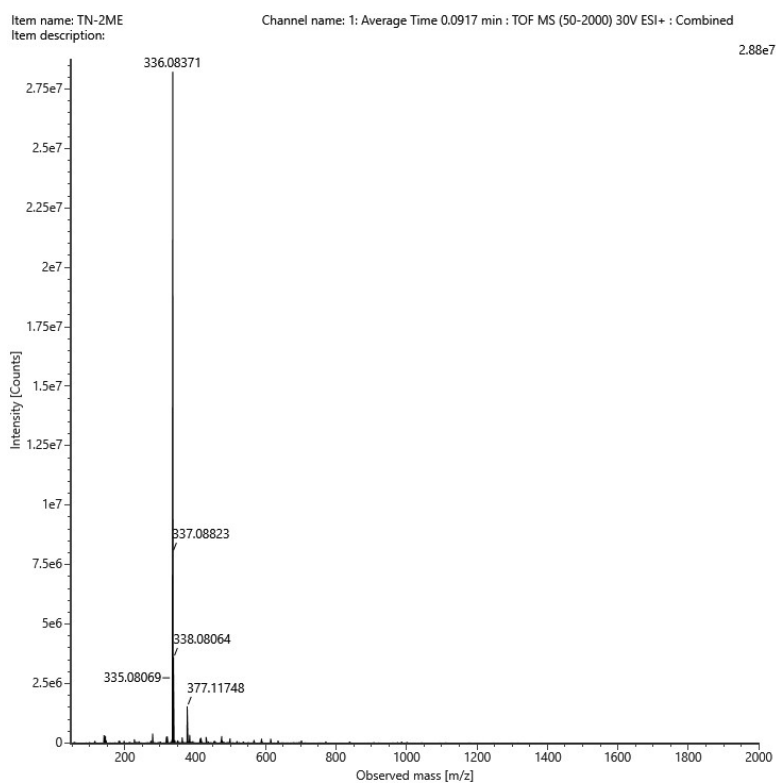

**Fig. S32** The HRMS (FTMS-ESI) spectrum of TN-2Me.

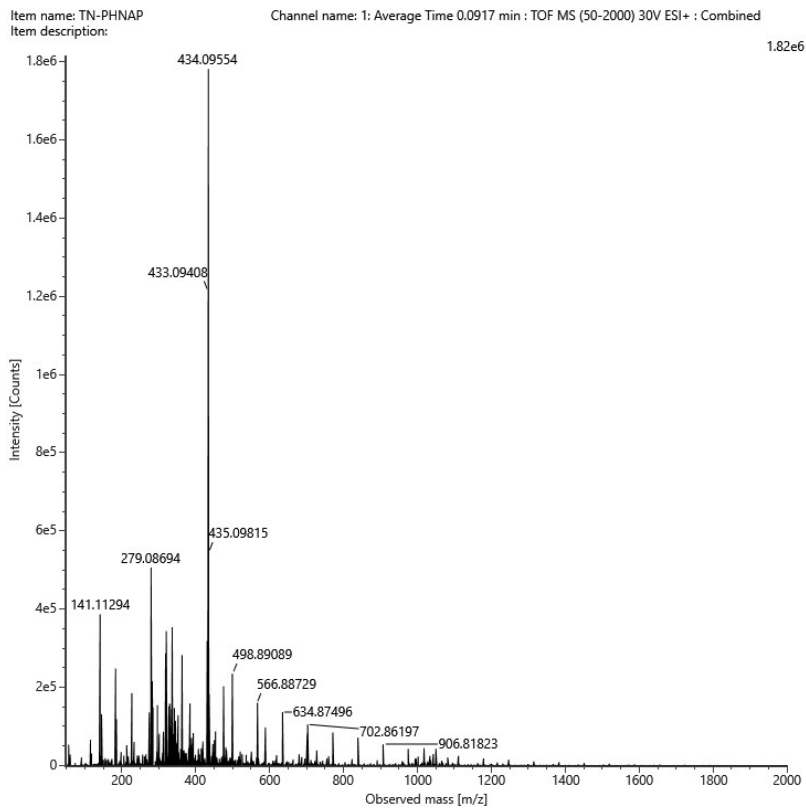

Fig. S33 The HRMS (FTMS-ESI) spectrum of TN-PhNap.

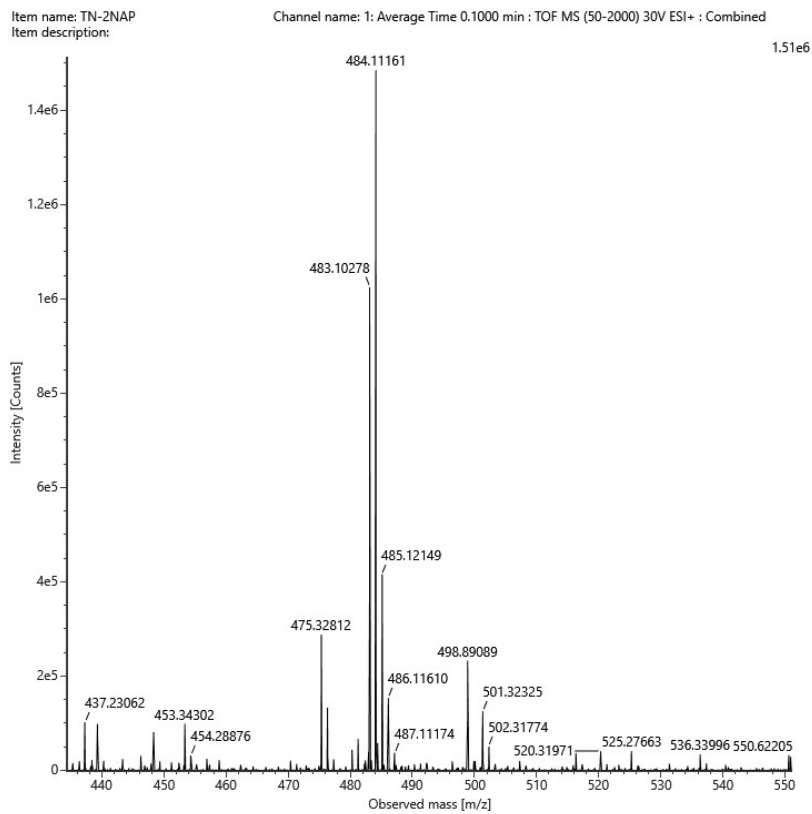

Fig. S34 The HRMS (FTMS-ESI) spectrum of TN-2Nap.

**Supplementary Video 1.**

60 °C hot water erases the photochromic pattern of the TN-2Nap-p film.

**Supplementary Video 2.**

80 °C hot water erases the photochromic pattern of the TN-2Nap-p film.

**Supplementary Video 3.**

TN-2Nap-p film immersed in liquid nitrogen, followed by UV irradiation, shows bright green long afterglow, but no photochromism is observed. Repeating the process, the film's color remains unchanged.

**Supplementary Video 4.**

TN-2Nap-p film immersed in ~25 °C water after continuous UV excitation shows that the blue color of the film does not fade immediately, in stark contrast to the rapid erasure of the photochromic pattern observed in 60 °C and 80 °C hot water.

**Supplementary Video 5.**

Afterglow pattern of TN-2Me-p film.

**Supplementary Video 6.**

Afterglow pattern of TN-PhNap-p film.

**Supplementary Video 7.**

Photo-induced RTP of the flexible TN-2Me-p.

**Supplementary Video 8.**

Photochromism and afterglow of TN-2Nap-p film in 60 °C water, with demonstration of repeatability. Repeatedly excited the sample 7 times, with 4 on/off cycles in ambient light and 3 in darkness. The afterglow and photochromic properties of the material showed no significant changes.

**References**

1. Y. Xiao, M. Shen, J. Li, H. Wang, H. Sun, Yunfei He, R. Huang, T. Yu and W. Huang. Thermally activated photochromism: realizing temperature-gated triphenylethylene photochromic materials. *Adv. Funct. Mater.*, 2024, 2312930. DOI: [10.1002/adfm.202312930](https://doi.org/10.1002/adfm.202312930)
2. Y. Sun, X. Yang, Z. Feng, B. Liu, D. Zhong, J. Zhang, G. Zhou and Z. Wu. Highly efficient deep-red organic light-emitting devices based on asymmetric iridium(III) complexes with the thianthrene 5,5,10,10-tetraoxide moiety. *ACS Appl. Mater. Interfaces*, 2019, **11**, 26152-26164.
3. W. Qiu, X. Cai, M. Li, L. Wang, Y. He, W. Xie, Z. Chen, M. Liu and S. Su. Dynamic adjustment of emission from both singlets and triplets: the role of excited state conformation relaxation and charge transfer in phenothiazine derivatives. *J. Mater. Chem. C.*, 2021, **9**, 1378-1386.
4. C. Burkhart and G. Haberhauer. A Light- and electricity-driven molecular pushing motor. *Eur. J. Org. Chem.* 2017, 1308-1317.
